# Supplementary material for: The synthesis and efficient one-pot catalytic “self-breeding” of asymmetrical NC(sp3)E-hybridised pincer complexes
Source: Royal Society of Chemistry journal article supplement (doi:10.1039/c6cc00763e), 2016-01-01
Supplement: c6cc00763e1.pdf [file c6cc00763e1.pdf]

## The Synthesis and Efficient One-Pot Catalytic “Self-Breeding” of Asymmetrical NC(*sp*<sup>3</sup>)E-Hybridised Pincer Complexes

Xiang-Yuan Yang,<sup>[a]</sup> Wee Shan Tay,<sup>[a]</sup> Yongxin Li,<sup>[a]</sup> Sumod A. Pullarkat,<sup>[a]</sup> Pak-Hing Leung\*<sup>[a]</sup>

<sup>[a]</sup> Division of Chemistry & Biological Chemistry, School of Physical and Mathematical Sciences, Nanyang Technological University, Singapore 637371, Singapore Fax: (+65) 6791 1961; e-mail: pakhing@ntu.edu.sg.

### Supporting Information

|                                                                       |               |
|-----------------------------------------------------------------------|---------------|
| <b><u>Table of Contents</u></b>                                       | <b>S1</b>     |
| <b>General Information</b>                                            | <b>S2</b>     |
| <b>Experimental Section</b>                                           | <b>S2-5</b>   |
| <b>Reference</b>                                                      | <b>S5</b>     |
| <b>NMR Spectra</b>                                                    | <b>S6-11</b>  |
| <b>2D <sup>1</sup>H-<sup>1</sup>H NOESY NMR Spectrum of Complex 4</b> | <b>S12-13</b> |
| <b>HPLC Spectra</b>                                                   | <b>S14-27</b> |
| <b>Crystallographic Data</b>                                          | <b>S28-33</b> |
| <b>Selected Bond Lengths and Angles of Complex 4</b>                  | <b>S34</b>    |

---

## General Information

All reactions were carried out under a positive pressure of nitrogen using standard Schlenk technique. NMR spectra were recorded on Bruker AV 300, AV 400 and AV 500 spectrometers. Chemical shifts were reported in ppm and referenced to an internal SiMe<sub>4</sub> standard (0 ppm) for <sup>1</sup>H NMR, chloroform-d (77.23 ppm) for <sup>13</sup>C NMR, and an external 85% H<sub>3</sub>PO<sub>4</sub> for <sup>31</sup>P{<sup>1</sup>H} NMR. DCM, DCE, DEE, toluene, acetone, acetonitrile and MeOH were purchased from their respective companies and used as supplied. THF was distilled prior to use. Solvents were degassed when necessary. A Low Temp Pairstirrer PSL-1400 was used for controlling low temperature reactions. Column chromatography was carried out with Silica gel 60 (Merck). Melting points were measured using SRS Optimelt Automated Point System SRS MPA100. Optical rotation were measured with JASCO P-1030 Polarimeter in the specified solvent in a 0.1 dm cell at 22.0°C. The enantioselectivities of the hydrophosphination reactions were determined with Agilent 1200 Series High Performance Liquid Chromatography (HPLC) machine fitted with a Daicel Chiralpak IC column and eluted with a mixture of *n*-hexane/2-propanol.

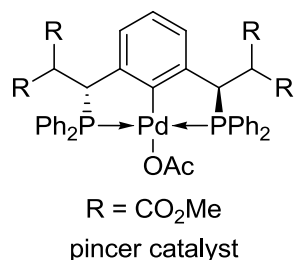

Figure S1. Molecular structure of pincer catalyst.

The pincer catalyst **1**<sup>1</sup> and diene **2**<sup>2</sup> were prepared according to literature methods. PdCl<sub>2</sub>(NCMe)<sub>2</sub> was prepared by adding PdCl<sub>2</sub> portionwise to boiling acetonitrile under vigorous stirring for 30 mins. The yellow suspension was filtered and the yellow residue (PdCl<sub>2</sub>(NCMe)<sub>2</sub>) washed with acetonitrile and dried. All other reactants and reagents were used as supplied without further purification unless stated otherwise.

## Synthesis of ligand 3a

To a solution of Ph<sub>2</sub>PH (93.1 mg, 0.500 mmol, 1.1 equiv) in acetone (25 mL) was added the pincer catalyst **1** (20.7 mg, 0.023 mmol, 5 mol %) and stirred for 10 minutes before cooling to 0°C. Dienone **2** (107.1 mg, 0.455 mmol, 1.0 equiv) was added and the mixture was stirred at 0°C. Upon completion of the reaction as determined by <sup>31</sup>P{<sup>1</sup>H} NMR, the mixture was warmed up to room temperature. S<sub>8</sub> (0.035 g, 0.137 mmol, 0.3 equiv) was added and stirred for 30 min. The crude product was purified by silica gel column chromatography (2 DCM : 1 *n*-hexane) to afford pure white solid of **3a** (181 mg, 0.409 mmol, 90 % yield). [α]<sub>D</sub> = -378 (*c* 0.1, DCM). Mp: 95-97°C. <sup>31</sup>P{<sup>1</sup>H} NMR (CDCl<sub>3</sub>, 162 MHz): δ 49.6; <sup>1</sup>H NMR (CDCl<sub>3</sub>, 400 MHz): δ 8.66 (d, 1H, <sup>3</sup>J = 4.2 Hz, Ar), 8.13-8.07 (m, 2H, Ar), 7.93-7.89 (m, 3H, Ar), 7.78-7.74 (m, 1H, Ar), 7.50-7.38 (m, 7H, Ar), 7.21-7.12 (m, 5H, Ar), 6.29 (dd, 1H, <sup>3</sup>J = 15.9 Hz, <sup>4</sup>J<sub>HP</sub> = 4.6 Hz, PhCH=CH), 6.16 (ddd, 1H, <sup>3</sup>J = 15.8 Hz, <sup>3</sup>J<sub>HP</sub> = 8.7 Hz, <sup>3</sup>J = 6.5 Hz, PhCH=CH), 4.50-4.42 (m, 1H, PCHCH<sub>2</sub>), 4.11 (ddd, 1H, <sup>2</sup>J = 17.7 Hz, <sup>3</sup>J<sub>PH</sub> = 10.5 Hz, <sup>3</sup>J =

5.6 Hz, O=CCH<sub>2</sub>), 3.35 (ddd, 1H, <sup>2</sup>J = 17.6 Hz, <sup>3</sup>J<sub>PH</sub> = 12.5 Hz, <sup>3</sup>J = 2.3 Hz, O=CCH<sub>2</sub>); <sup>13</sup>C NMR (CDCl<sub>3</sub>, 100 MHz): δ 198.9 (d, 1C, <sup>3</sup>J<sub>PC</sub> = 15.1 Hz, C=O), 152.9 (1C, Ar), 149.1 (1C, Ar), 136.9-122.0 (23C, Ar + C=C), 40.5 (d, 1C, <sup>1</sup>J<sub>PC</sub> = 54.9 Hz, PCH), 37.5 (1C, O=CCH<sub>2</sub>). HRMS (+ESI) m/z: (M + H)<sup>+</sup> calcd for C<sub>28</sub>H<sub>25</sub>NOPS, 454.1394; found, 454.1396. Anal. Calcd for C<sub>28</sub>H<sub>24</sub>NOPS: C, 74.15; H, 5.33; N, 3.09. Found: C, 74.58; H, 5.77; N, 2.66 %. The *ee* was determined on a Daicel Chiralpak IC column with n-hexane/2-propanol = 95/5, flow = 1.0 mL/min, wavelength = 270 nm. Retention times: 23.1 min (major), 28.1 min (minor).

### Synthesis of ligand 3b

The preparation is similar to that of compound **3a** but aq. H<sub>2</sub>O<sub>2</sub> (31% w/w, 0.2 mL) was used instead of S<sub>8</sub>. Purification by silica gel column chromatography (3 DCM : 1 EA) afforded the pure white solid of **3b** (171 mg, 0.391 mmol, 86% yield). [α]<sub>D</sub> = -429 (c 0.1, DCM). Mp: 191-193°C (dec.). <sup>31</sup>P{<sup>1</sup>H} NMR (CDCl<sub>3</sub>, 121 MHz): δ 34.2; <sup>1</sup>H NMR (CDCl<sub>3</sub>, 400 MHz): δ 8.65 (d, 1H, <sup>3</sup>J = 4.2 Hz, Ar), 7.96-7.92 (m, 3H, Ar), 7.84-7.74 (m, 3H, Ar), 7.50-7.41 (m, 7H, Ar), 7.22-7.13 (m, 5H, Ar), 6.35 (dd, 1H, <sup>3</sup>J = 16.0 Hz, <sup>4</sup>J<sub>HP</sub> = 4.3 Hz, PhCH=CH), 6.12 (ddd, 1H, <sup>3</sup>J = 15.9 Hz, <sup>3</sup>J<sub>HP</sub> = 8.8 Hz, <sup>3</sup>J = 5.9 Hz, PhCH=CH), 4.19-4.13 (m, 1H, PCHCH<sub>2</sub>), 4.03 (ddd, 1H, <sup>2</sup>J = 17.6 Hz, <sup>3</sup>J<sub>HP</sub> = 10.7 Hz, <sup>3</sup>J = 5.2 Hz, O=CCH<sub>2</sub>), 3.47 (ddd, 1H, <sup>2</sup>J = 17.4 Hz, <sup>3</sup>J<sub>HP</sub> = 10.9 Hz, <sup>3</sup>J = 2.4 Hz, O=CCH<sub>2</sub>); <sup>13</sup>C NMR (CDCl<sub>3</sub>, 100 MHz): δ 198.9 (d, 1C, <sup>3</sup>J<sub>PC</sub> = 13.2 Hz, C=O), 152.9 (1C, Ar), 149.0 (1C, Ar), 136.8-121.9 (23C, Ar + C=C), 39.6 (d, 1C, <sup>1</sup>J<sub>PC</sub> = 69.6 Hz, PCH), 36.4 (1C, O=CCH<sub>2</sub>). HRMS (+ESI) m/z: (M + H)<sup>+</sup> calcd for C<sub>28</sub>H<sub>25</sub>NO<sub>2</sub>P, 438.1623; found, 438.1625. Anal. Calcd for C<sub>28</sub>H<sub>24</sub>NO<sub>2</sub>P: C, 76.87; H, 5.53; N, 3.20. Found: C, 76.37; H, 5.89; N, 2.79 %. The *ee* was determined on a Daicel Chiralpak IC column with n-hexane/2-propanol = 85/15, flow = 1.0 mL/min, wavelength = 260 nm. Retention times: 70.5 min (major), 79.3 min (minor).

### Synthesis of pincer complex 4a

A mixture of PdCl<sub>2</sub> (3.90 mg, 22.0 μmol, 1.0 equiv) and LiCl (3.73 mg, 88.0 μmol, 4.0 equiv) in MeOH (10 mL) was stirred for 30 mins. The ligand **3a** (9.99 mg, 22.0 μmol, 1.0 equiv.) was added to the mixture and stirred. Monitoring of the reaction completion was done by thin-layer chromatography (DCM) and confirmed by <sup>31</sup>P{<sup>1</sup>H} NMR spectroscopy. The crude product was purified by silica gel column chromatography (2 EA : 1 *n*-hexane) to afford white solid of complex **4a** (9.80 mg, 16.9 μmol, 77% yield). [α]<sub>D</sub> = -180 (c 0.1, DCM). Mp: 226-228°C (dec.). <sup>31</sup>P{<sup>1</sup>H} NMR (CDCl<sub>3</sub>, 121 MHz): δ 67.2; <sup>1</sup>H NMR (CDCl<sub>3</sub>, 300 MHz): δ 9.16 (d, 1H, <sup>3</sup>J = 5.1 Hz, Ar), 8.17-8.11 (m, 2H, Ar), 7.95 (td, 1H, <sup>3</sup>J = 7.7 Hz, <sup>4</sup>J = 1.4 Hz, Ar), 7.84-7.78 (m, 2H, Ar), 7.71-7.47 (m, 8H, Ar), 7.26-7.17 (m, 5H, Ar), 6.49 (dd, 1H, <sup>3</sup>J = 16.0 Hz, <sup>4</sup>J<sub>HP</sub> = 5.0 Hz, PhCH=CH), 5.87 (ddd, 1H, <sup>3</sup>J = 15.9, 5.7 Hz, <sup>3</sup>J<sub>HP</sub> = 8.7 Hz, PhCH=CH), 4.87-4.76 (m, 1H, PCH), 4.45 (dd, 1H, <sup>3</sup>J<sub>HP</sub> = 9.9 Hz, <sup>3</sup>J = 4.9 Hz, PdCH); <sup>13</sup>C NMR (CDCl<sub>3</sub>, 75 MHz): δ 192.9 (d, 1C, <sup>3</sup>J<sub>PC</sub> = 17.7 Hz, C=O), 155.9 (1C, Ar), 148.8 (1C, Ar), 139.6-122.3 (23C, Ar + C=C), 55.2 (1C, PdCH), 50.7 (d, 1C, <sup>1</sup>J<sub>PC</sub> = 62.6 Hz, PCH). HRMS (+ESI) m/z: (M - Cl)<sup>+</sup> calcd for C<sub>28</sub>H<sub>23</sub>NOPPdS, 558.0273; found, 558.0274. Anal. Calcd for C<sub>28</sub>H<sub>23</sub>CINOPPdS: C, 56.58; H, 3.90; N, 2.36. Found: C, 56.96; H, 3.46; N, 2.57 %.

## Synthesis of pincer complex **4b**

A mixture of PdCl<sub>2</sub>(NCMe)<sub>2</sub> (5.71 mg, 22.0 μmol, 1.0 equiv), NaOAc (1.81 mg, 22.0 μmol, 1.0 equiv) and ligand **3b** (9.62 mg, 22.0 μmol, 1.0 equiv.) in DCM (10 mL) was stirred in a one-neck RBF. Monitoring of the reaction completion was done by thin-layer chromatography (1 DCM : 1 EA) and confirmed by <sup>31</sup>P{<sup>1</sup>H} NMR spectroscopy. The crude product was purified by silica gel column chromatography (10 DCM : 1 EA to 8 DCM : 1 EA) to afford pure yellow solid of **4b** (10.8 mg, 18.7 μmol, 85% yield). [α]<sub>D</sub> = -446 (c 0.1, DCM). Mp: 170-171°C (dec.). <sup>31</sup>P{<sup>1</sup>H} NMR (CDCl<sub>3</sub>, 162 MHz): δ 74.9; <sup>1</sup>H NMR (CDCl<sub>3</sub>, 400 MHz): δ 9.07 (d, 1H, <sup>3</sup>J = 5.1 Hz, Ar), 8.12-8.08 (m, 2H, Ar), 7.95 (td, 1H, <sup>3</sup>J = 7.8 Hz, <sup>4</sup>J = 1.4 Hz, Ar), 7.86-7.81 (m, 2H, Ar), 7.70-7.58 (m, 5H, Ar), 7.54-7.49 (m, 2H, Ar), 7.45-7.42 (m, 1H, Ar), 7.30-7.20 (m, 5H, Ar), 6.59 (dd, 1H, <sup>3</sup>J = 15.8 Hz, <sup>4</sup>J<sub>HP</sub> = 4.5 Hz, PhCH=CH), 5.85 (ddd, 1H, <sup>3</sup>J = 15.8, 5.6 Hz, <sup>3</sup>J<sub>HP</sub> = 8.5 Hz, PhCH=CH), 4.76 (dd, 1H, <sup>3</sup>J<sub>HP</sub> = 10.4 Hz, <sup>3</sup>J = 2.2 Hz, PdCH), 4.71-4.62 (m, 1H, PCH); <sup>13</sup>C NMR (CDCl<sub>3</sub>, 100 MHz): δ 193.0 (d, 1C, <sup>3</sup>J<sub>PC</sub> = 15.5 Hz, C=O), 157.4 (1C, Ar), 151.5 (1C, Ar), 139.6-121.6 (23C, Ar + C=C), 55.6 (1C, PdCH), 46.3 (d, 1C, <sup>1</sup>J<sub>PC</sub> = 75.6 Hz, PCH). HRMS (+ESI) m/z: (M - Cl)<sup>+</sup> calcd for C<sub>28</sub>H<sub>23</sub>NO<sub>2</sub>PPd, 542.0501; found, 542.0500. Anal. Calcd for C<sub>28</sub>H<sub>23</sub>ClNO<sub>2</sub>PPd: C, 58.15; H, 4.01; N, 2.42. Found: C, 58.39; H, 3.84; N, 2.16 %.

## General procedure for the asymmetric hydrophosphination reaction

A Schlenk tube was charged with HPPH<sub>2</sub> (12.1 mg, 65.0 μmol, 1.5 equiv), complex **4a/b** (2.2 μmol, 5 mol%), base (8.7 μmol, 20 mol%) and diene **2** (10.2 mg, 43.3 μmol, 1.0 equiv) in the stated solvent (2.5 mL) and where specified, H<sub>2</sub>O (0.25 mL) was added and stirred at RT for 24h. Subsequently, aq. H<sub>2</sub>O<sub>2</sub> (31% w/w, 0.1 mL) or S<sub>8</sub> (3.33 mg, 13.0 μmol, 0.3 equiv.) was introduced to the mixture. The volatiles were removed and the crude product loaded directly onto silica gel column (3 DCM : 1 EA or 2 DCM : 1 *n*-hexane) to afford pure white solid of **3b** or **3a** respectively.

## General procedure for recycling of pincer complex **4a**

A Schlenk tube was charged with HPPH<sub>2</sub> (37.2 mg, 200 μmol, 1.5 equiv), complex **4a** (7.91 mg, 13.3 μmol, 10 mol%), KOAc (5.22 mg, 53.2 μmol, 40 mol%) and diene **2** (31.3 mg, 133 μmol, 1.0 equiv) in THF/H<sub>2</sub>O (8 mL/0.8 mL). The mixture was stirred at RT for 24h. LiCl (56.4 mg, 1.33 mmol, 10.0 equiv.) was introduced to the mixture and stirred for 6 h at RT. Subsequently, the mixture was treated with aq. H<sub>2</sub>O<sub>2</sub> (31% w/w, 0.3 mL), the volatiles were removed and the residue loaded directly onto silica gel column (1 *n*-hexane : 1 EA to 1 *n*-hexane : 2 EA) to afford pure white solid of **3b** and **4a**. The *ee* of compound **3b** was determined on a Daicel Chiralpak IC column with *n*-hexane/2-propanol = 85/15, flow = 1.0 mL/min, wavelength = 260 nm. Retention times: 70.5 min (major), 79.3 min (minor). The recovered complex **4a** was used in the second run in 10 mol% loading with the same procedure as above [**4a** (4.11 mg, 6.92 μmol, 10 mol%), KOAc (2.72 mg, 27.7 μmol, 40 mol%), HPPH<sub>2</sub> (19.3 mg, 104 μmol, 1.5 equiv), diene **2** (16.3 mg, 69.2 μmol, 1.0 equiv), THF (4 mL), H<sub>2</sub>O (0.4 mL), LiCl (29.3 mg, 69.2 μmol, 10.0 equiv), aq. H<sub>2</sub>O<sub>2</sub> (31% w/w, 0.2 mL)]. The recovered complex **4a** was again reused in the third run in 10 mol% loading [**4a** (1.85

mg, 3.11  $\mu\text{mol}$ , 10 mol%), KOAc (1.22 mg, 12.4  $\mu\text{mol}$ , 40 mol%), HPPPh<sub>2</sub> (8.69 mg, 46.7  $\mu\text{mol}$ , 1.5 equiv), diene **2** (7.32 mg, 31.1  $\mu\text{mol}$ , 1.0 equiv), THF (2 mL), H<sub>2</sub>O (0.2 mL), LiCl (13.2 mg, 311  $\mu\text{mol}$ , 10.0 equiv), aq. H<sub>2</sub>O<sub>2</sub> (31% w/w, 0.1 mL)].

### **Reference**

[1] X.-Y. Yang, J. H. Gan, Y. Li, S. A. Pullarkat and P.-H. Leung, *Dalton Trans.* **2015**, 44, 1258.

[2] a) X.-Y. Yang, W. S. Tay, Y. Li, S. A. Pullarkat and P.-H. Leung, *Organometallics* **2015**, 34, 5196; b) N. Molleti, N. K. Rana and V. K. Singh, *Org. Lett.* **2012**, 14, 4322.

[3] J. L. Bookham and W. McFarlane, *J. Chem. Soc., Chem. Commun.* **1993**, 1352.

## NMR Spectra

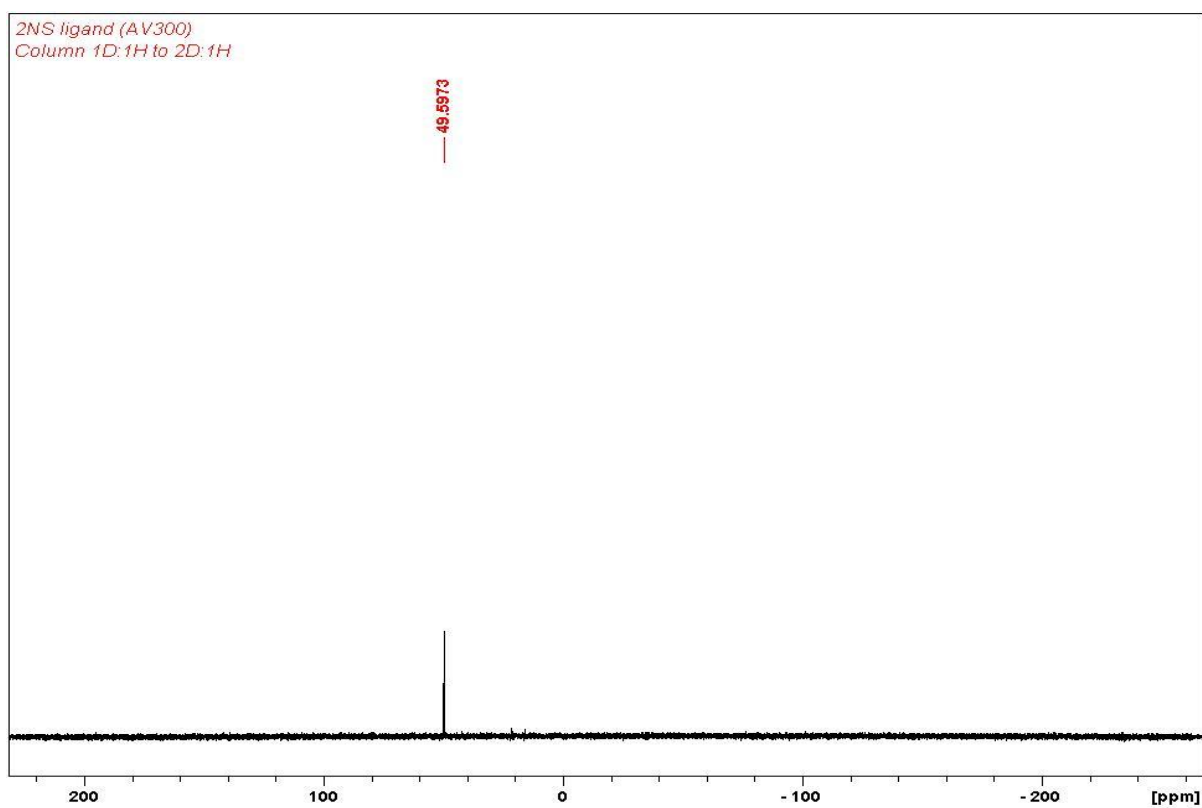

Figure s2.  $^{31}\text{P}\{^1\text{H}\}$  NMR spectrum of compound **3a**.

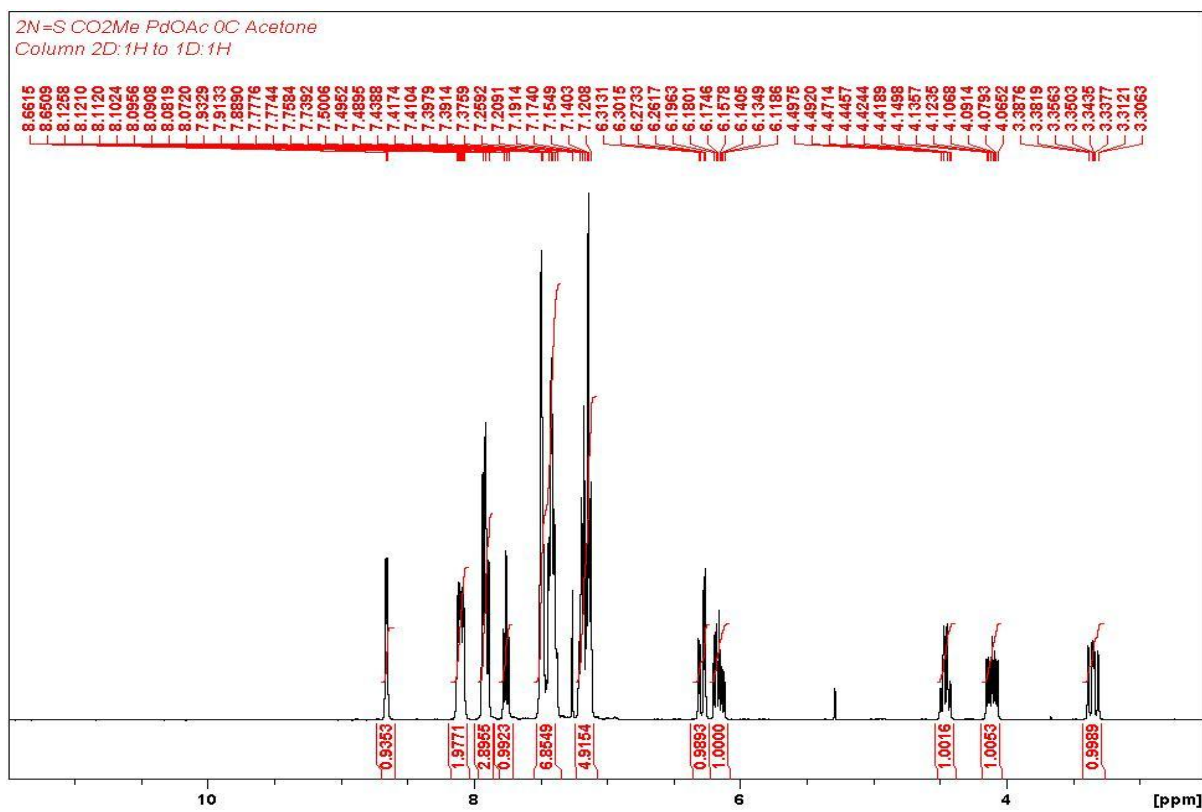

Figure s3.  $^1\text{H}$  NMR spectrum of compound **3a**.

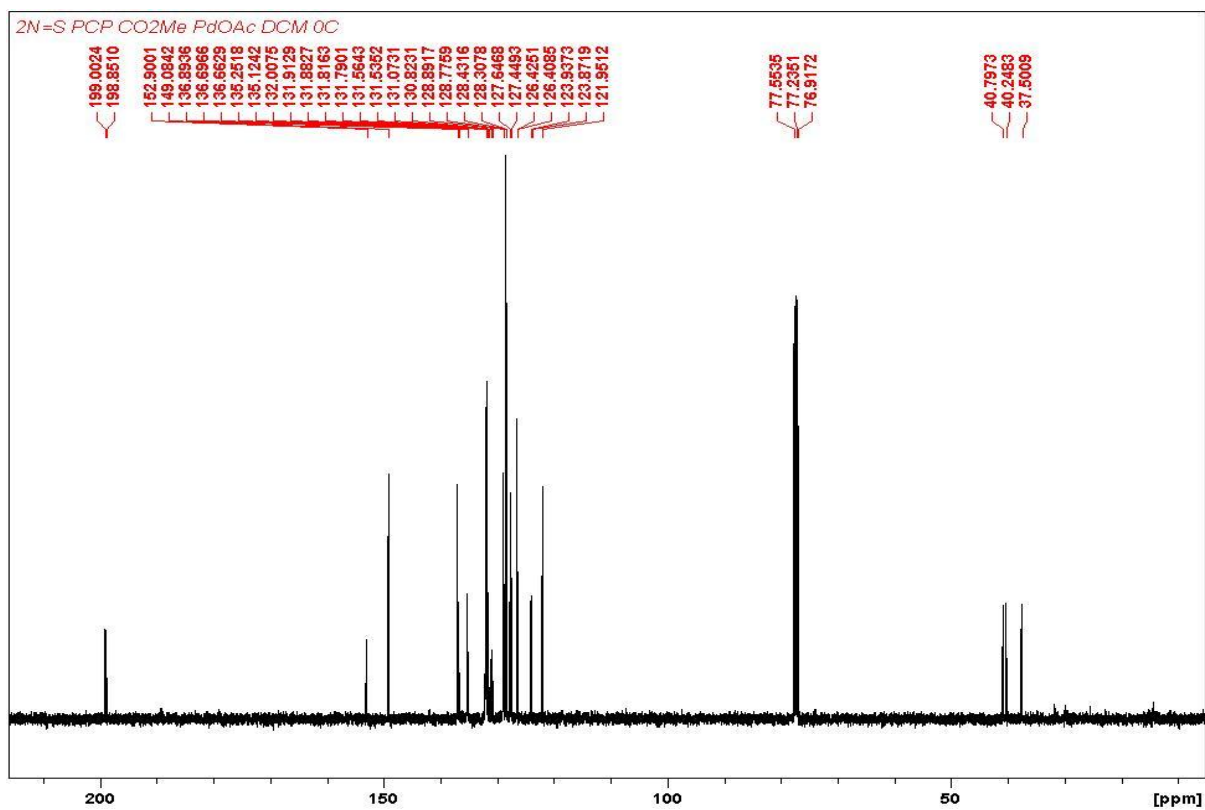

Figure s4.  $^{13}\text{C}$  NMR spectrum of compound **3a**.

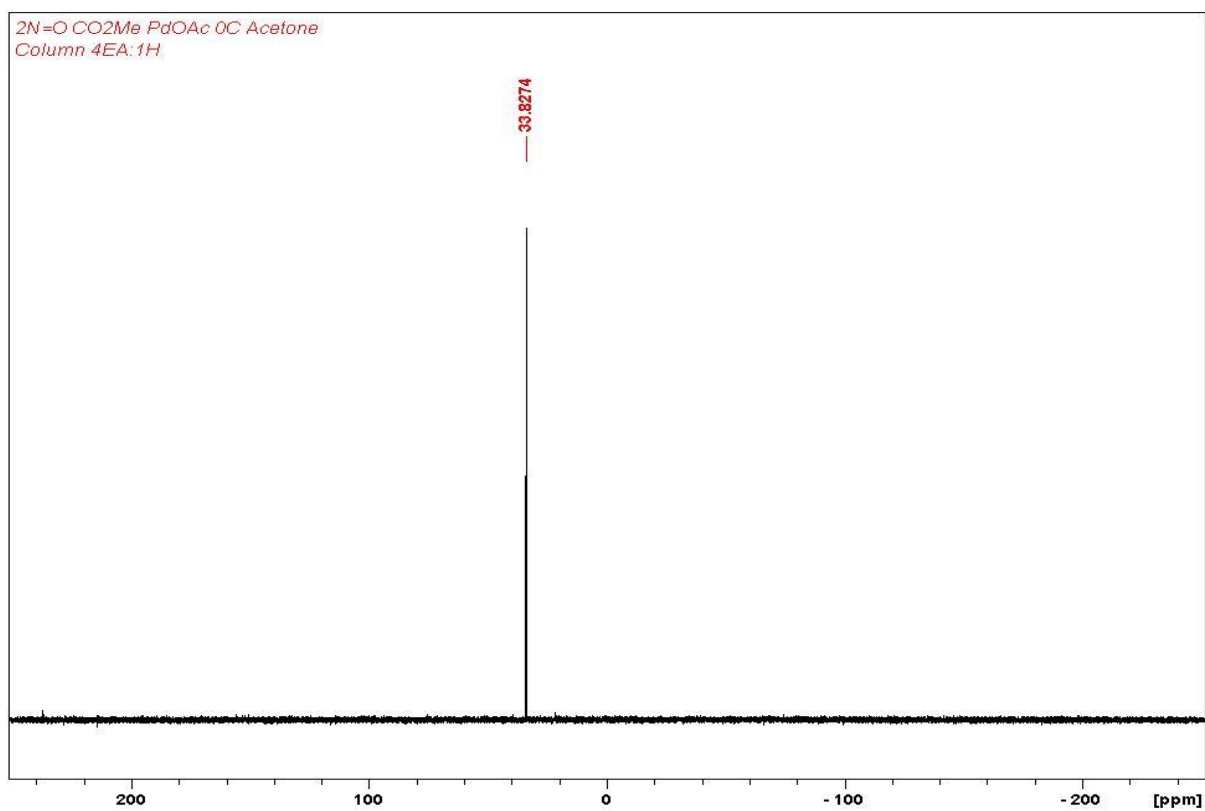

Figure s5.  $^{31}\text{P}\{^1\text{H}\}$  NMR spectrum of compound **3b**.

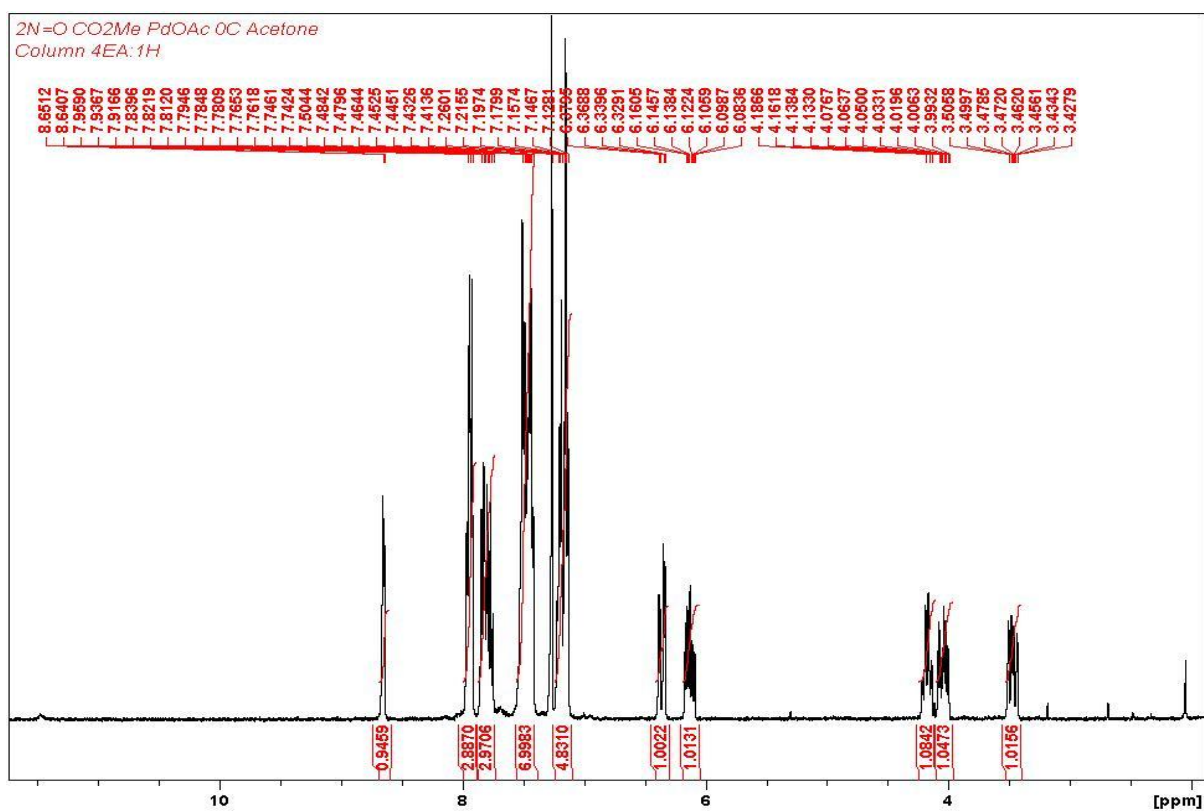

Figure s6.  $^1\text{H}$  NMR spectrum of compound **3b**.

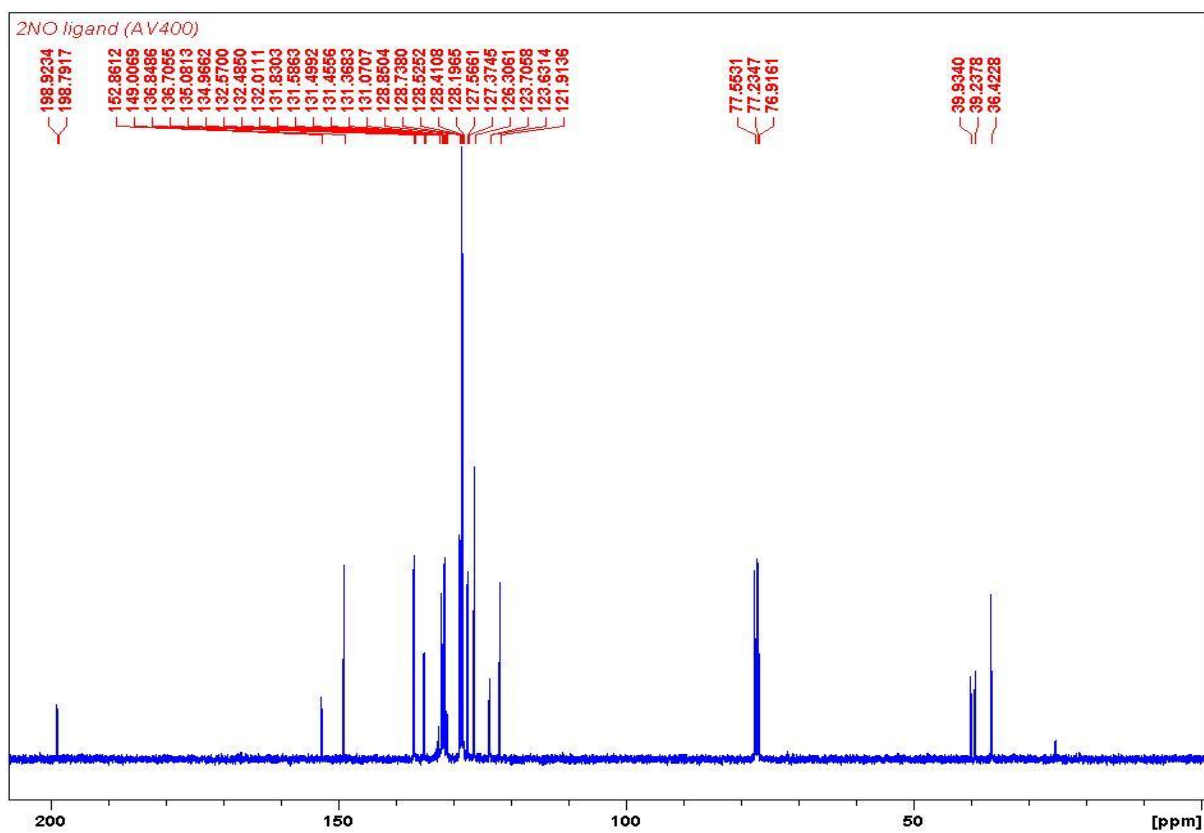

Figure s7.  $^{13}\text{C}$  NMR spectrum of compound **3b**.



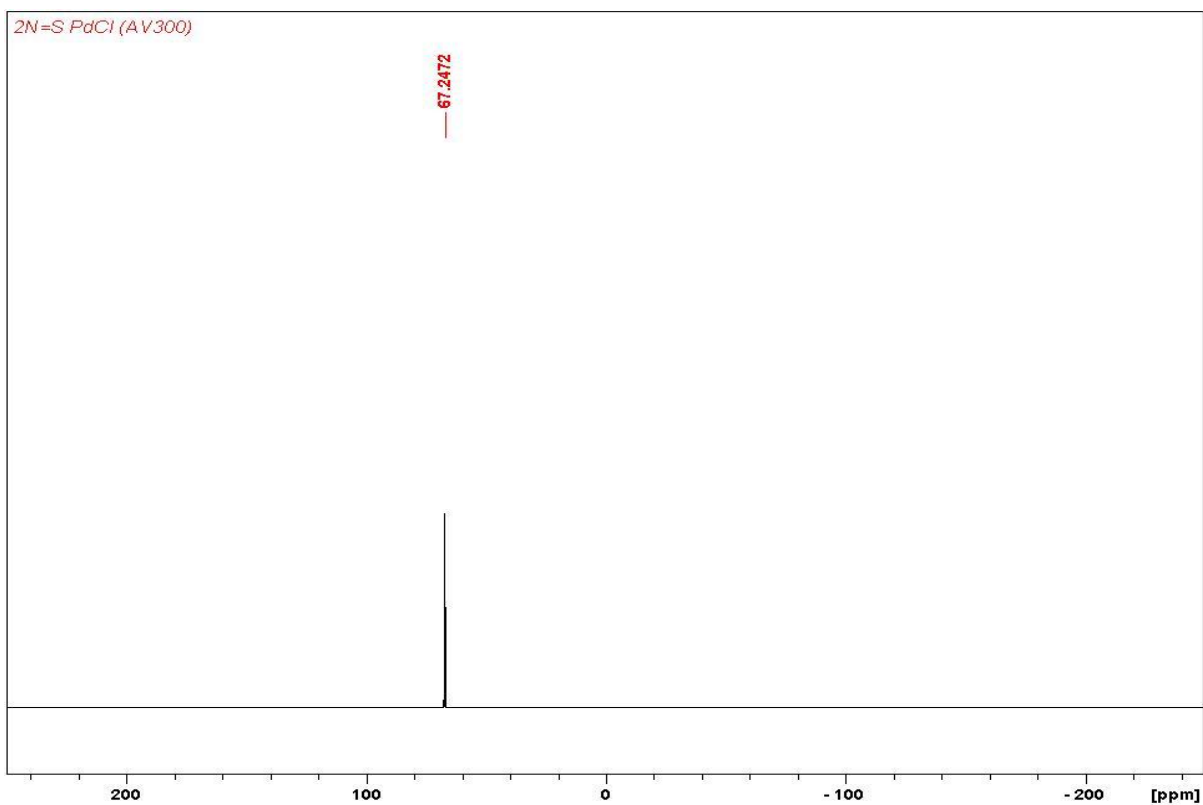

Figure s8.  $^{31}\text{P}\{^1\text{H}\}$  NMR spectrum of compound **4a**.

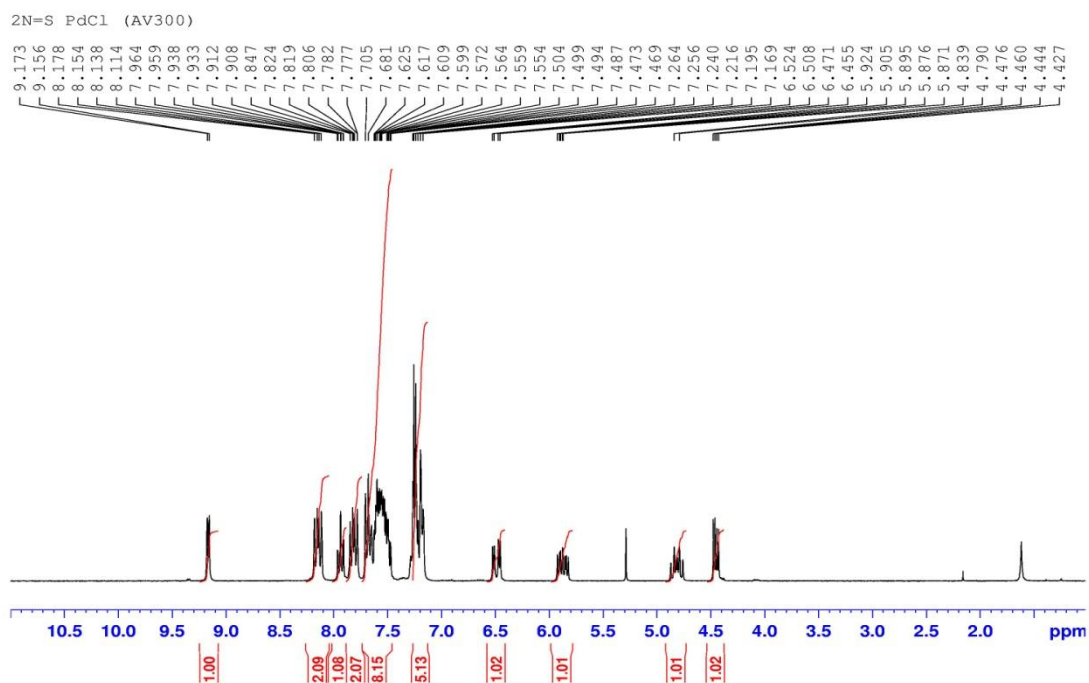

Figure s9.  $^1\text{H}$  NMR spectrum of compound **4a**.

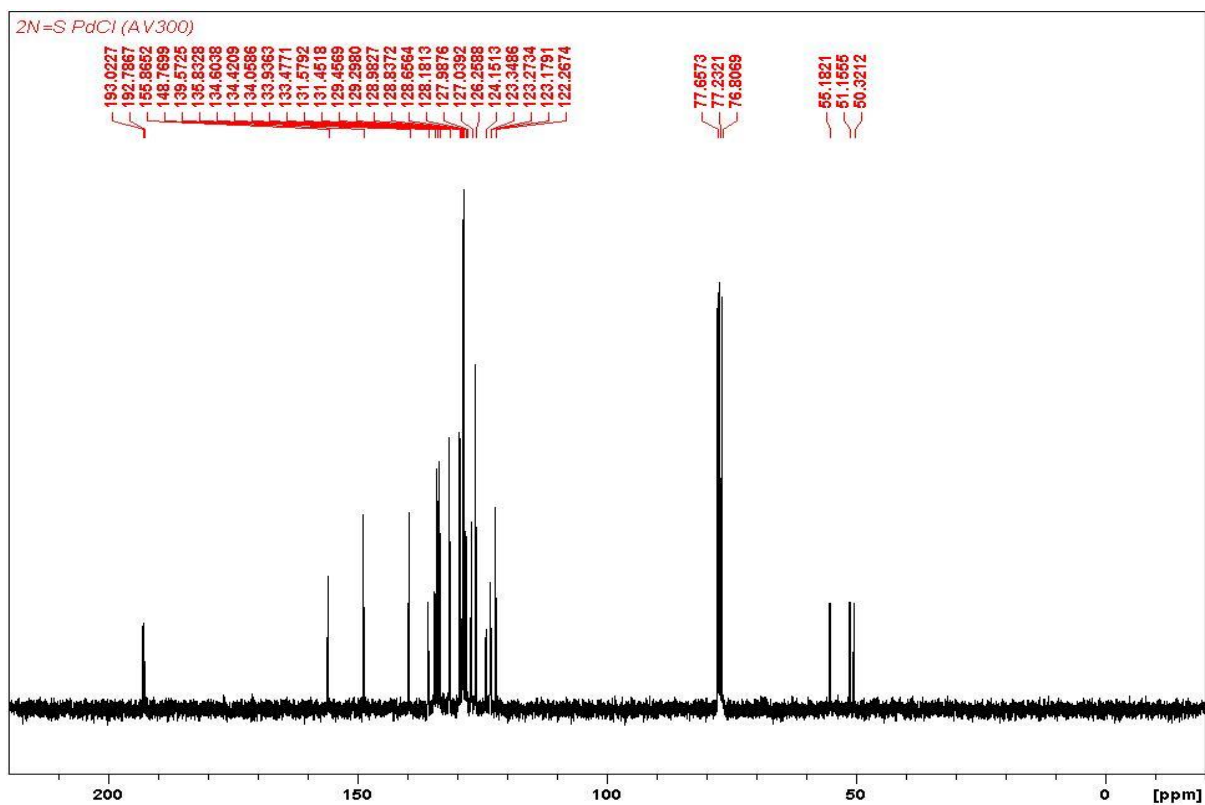

Figure s10.  $^{13}\text{C}$  NMR spectrum of compound **4a**.

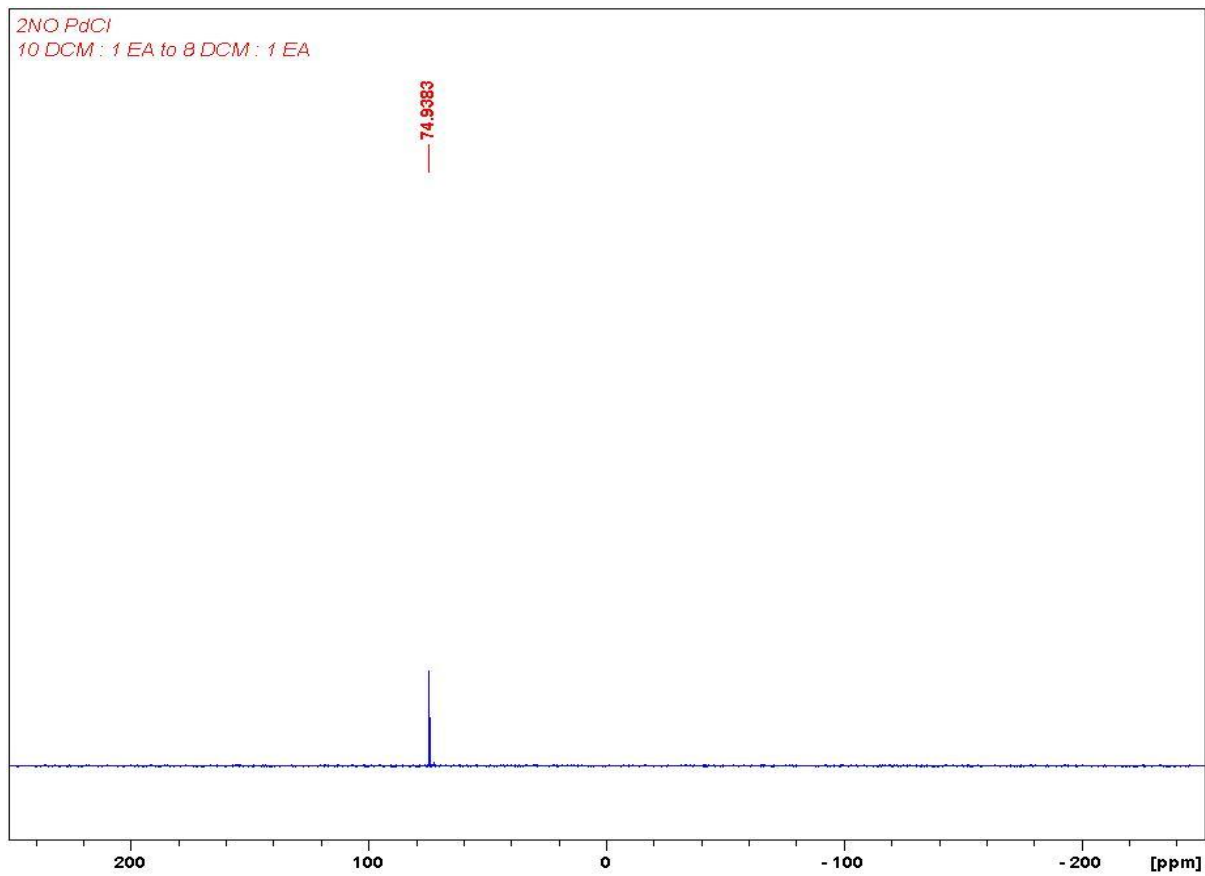

Figure s11.  $^{31}\text{P}\{^1\text{H}\}$  NMR spectrum of compound **4b**.

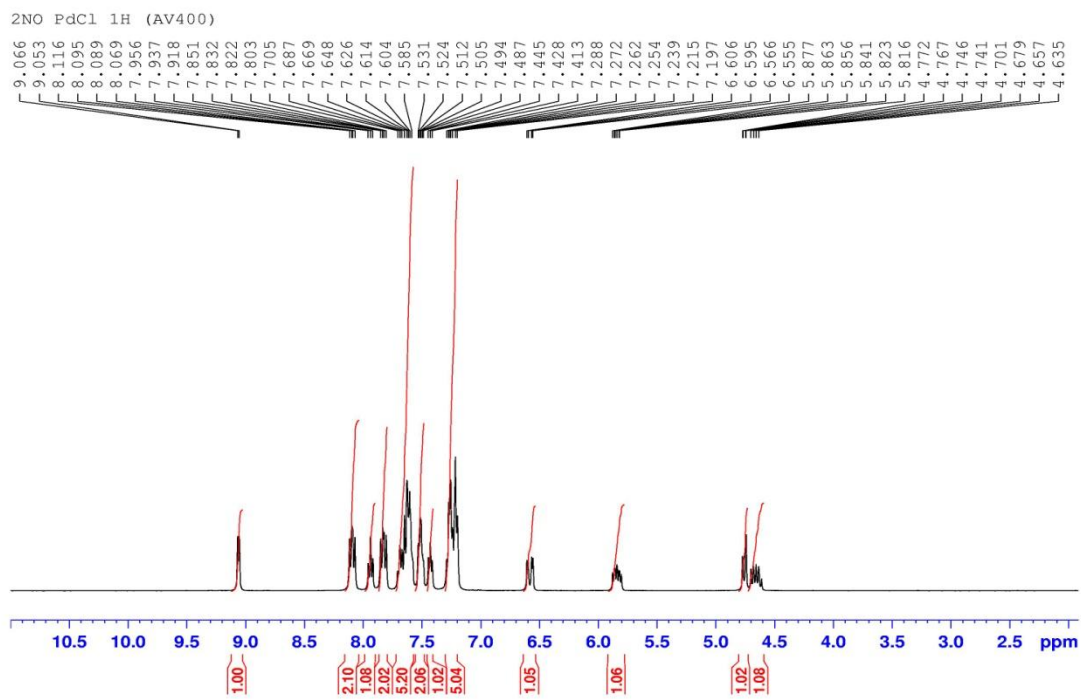

Figure s12.  $^1\text{H}$  NMR spectrum of compound **4b**.

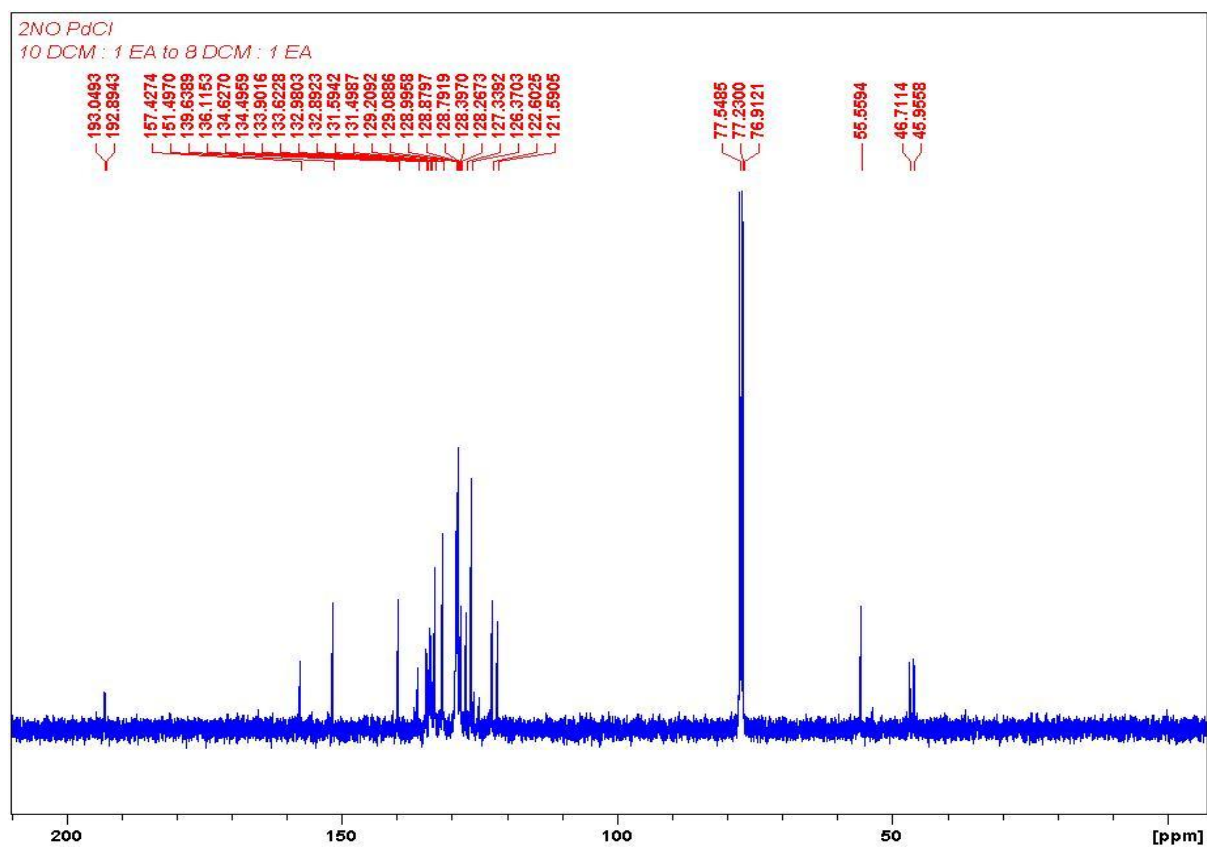

Figure s13.  $^{13}\text{C}$  NMR spectrum of compound **4b**.

## 2D $^1\text{H}$ - $^1\text{H}$ NOESY NMR Spectrum of Complex 4

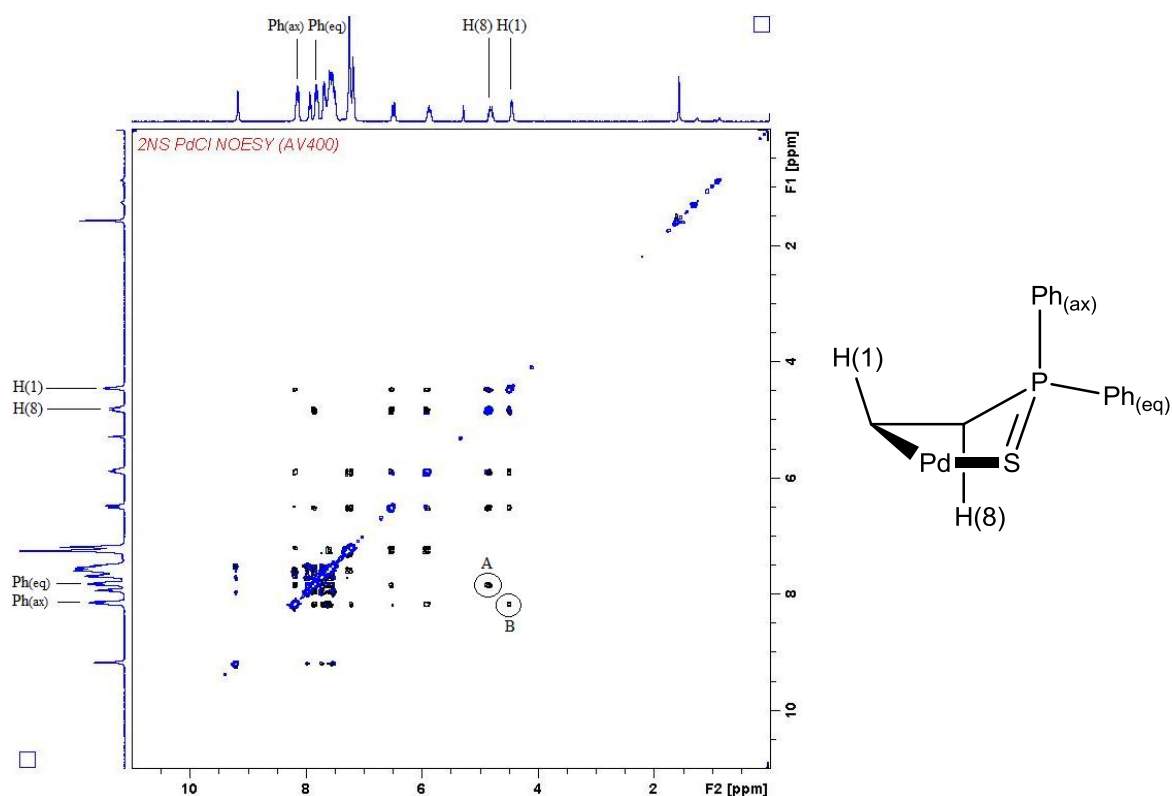

Figure s14. 2D  $^1\text{H}$ - $^1\text{H}$  NOESY NMR spectrum of complex **4a**.

A detailed analysis of the  $^1\text{H}$ - $^1\text{H}$  NOESY NMR spectrum of complex **4a** revealed the presence of the expected H(8)-Ph<sub>(eq)</sub> (A) and H(1)-Ph<sub>(ax)</sub> (B) NOE interactions arising from the S-P-C-C-Pd chelate ring with the  $\delta$ -conformation, as observed in the solid state. If this chiral five-membered ring undergoes a facile  $\delta$ - $\lambda$  dynamic transformation, the H(8)-Ph<sub>(ax)</sub> and H(1)-Ph<sub>(eq)</sub> NOE interactions would be observed.<sup>3</sup> The absence of these NOE signals in the 2-D NMR spectrum indicated that the S-P-C-C-Pd chelate ring is locked in the  $\delta$ -conformation in solution.

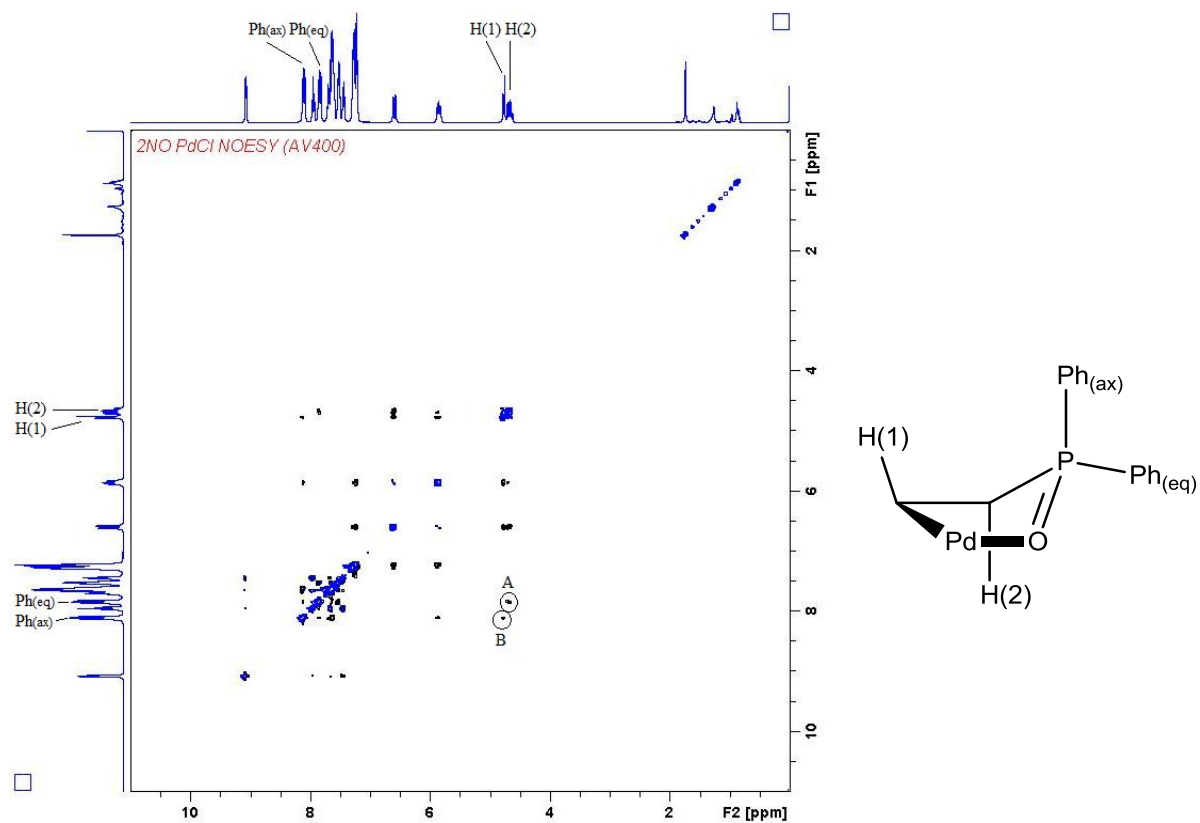

Figure s15. 2D  $^1\text{H}$ - $^1\text{H}$  NOESY NMR spectrum of complex **4b**.

From the spectrum, NOE interactions of  $\text{H}(2)$ - $\text{Ph}_{(\text{eq})}$  (A) and  $\text{H}(1)$ - $\text{Ph}_{(\text{ax})}$  (B) were observed. In conjunction with the absence of NOE signals arising from  $\text{H}(2)$ - $\text{Ph}_{(\text{ax})}$  and  $\text{H}(1)$ - $\text{Ph}_{(\text{eq})}$ , this conclusively imply that the O-P-C-C-Pd chelate ring is locked in the  $\delta$ -conformation in solution.

## HPLC Spectra

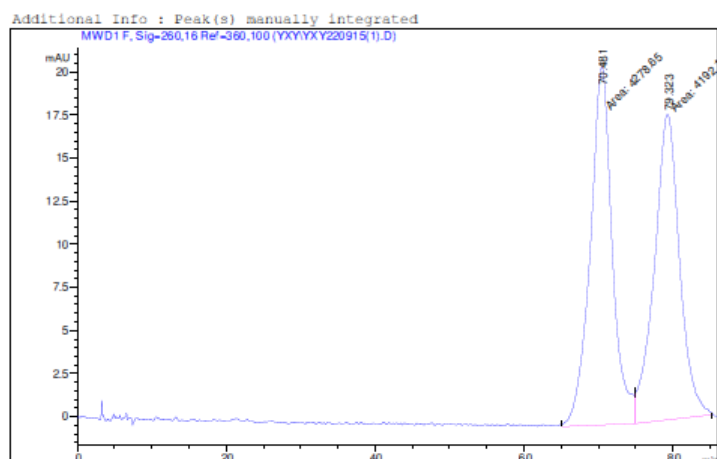

### Area Percent Report

Sorted By : Signal  
Multiplier: : 1.0000  
Dilution: : 1.0000  
Sample Amount: : 1.00000 [ng/ul] (not used in calc.)  
Use Multiplier & Dilution Factor with ISTDs

Signal 1: MWD1 F, Sig=260,16 Ref=360,100

| Peak # | RetTime [min] | Type | Width [min] | Area [mAU*s] | Height [mAU] | Area %  |
|--------|---------------|------|-------------|--------------|--------------|---------|
| 1      | 70.481        | MM   | 3.4333      | 4278.65137   | 20.77064     | 50.5104 |
| 2      | 79.323        | MM   | 3.9447      | 4192.18311   | 17.71251     | 49.4896 |

Figure s16. HPLC spectra of racemic **3b**.

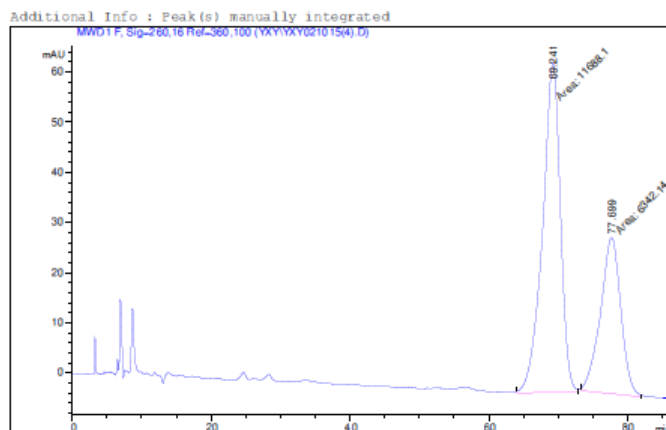

### Area Percent Report

Sorted By : Signal  
Multiplier: : 1.0000  
Dilution: : 1.0000  
Sample Amount: : 1.00000 [ng/ul] (not used in calc.)  
Use Multiplier & Dilution Factor with ISTDs

Signal 1: MWD1 F, Sig=260,16 Ref=360,100

| Peak # | RetTime [min] | Type | Width [min] | Area [mAU*s] | Height [mAU] | Area %  |
|--------|---------------|------|-------------|--------------|--------------|---------|
| 1      | 69.241        | MM   | 2.9624      | 1.16881e4    | 65.75838     | 64.8250 |
| 2      | 77.699        | MM   | 3.3956      | 6342.13770   | 31.12906     | 35.1750 |

Figure s17. HPLC spectra of chiral **3b** in Table 3 Entry 1.

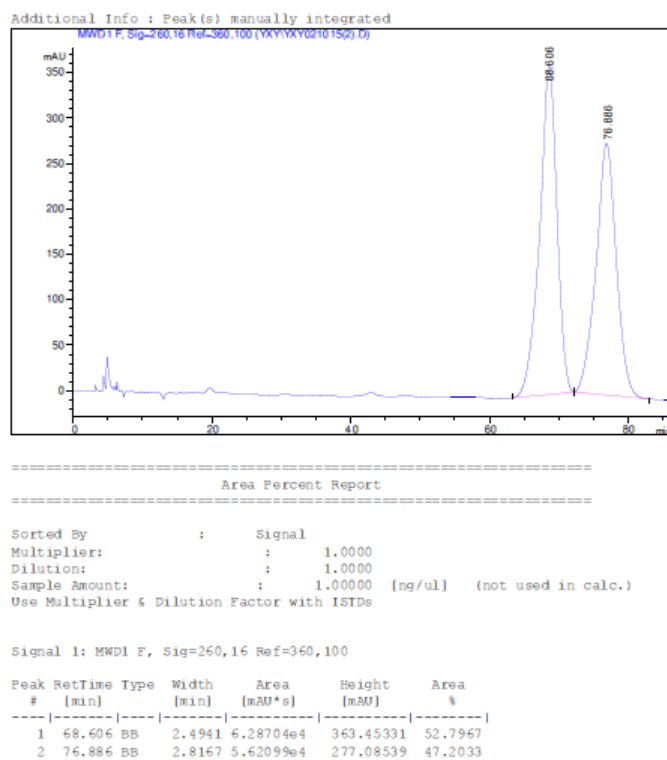

Figure s18. HPLC spectra of chiral **3b** in Table 3 Entry 2.

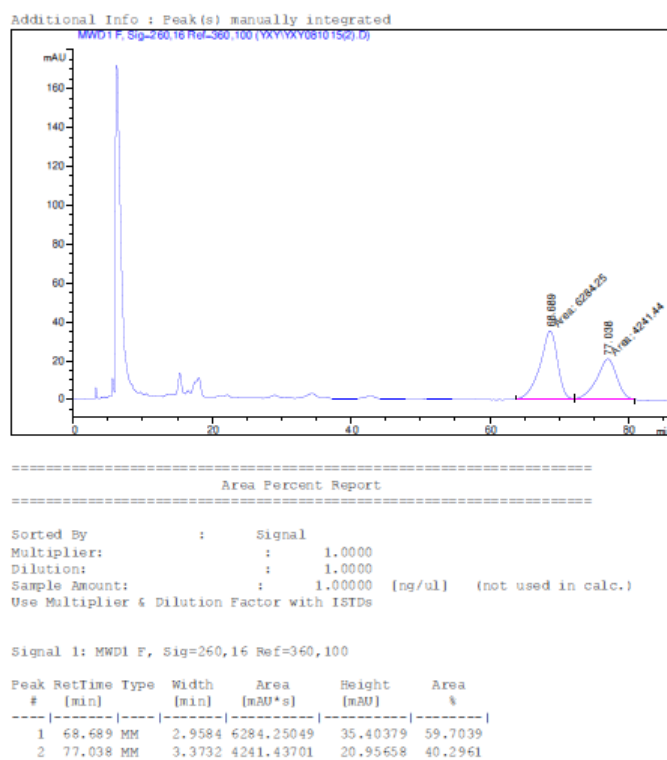

Figure s19. HPLC spectra of chiral **3b** in Table 3 Entry 3.

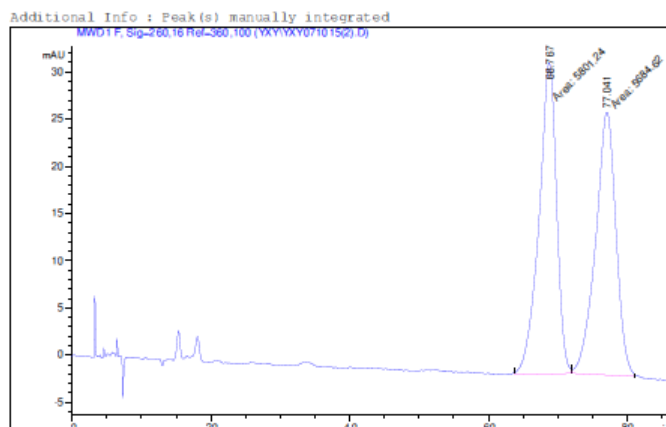

=====  
Area Percent Report  
=====

Sorted By : Signal  
Multiplier: : 1.0000  
Dilution: : 1.0000  
Sample Amount: : 1.00000 [ng/ul] (not used in calc.)  
Use Multiplier & Dilution Factor with ISTDs

Signal 1: MWD1 F, Sig=260,16 Ref=360,100

| Peak # | RetTime [min] | Type | Width [min] | Area [mAU*s] | Height [mAU] | Area %  |
|--------|---------------|------|-------------|--------------|--------------|---------|
| 1      | 68.767        | MM   | 2.9363      | 5801.23779   | 32.92863     | 50.5077 |
| 2      | 77.041        | MM   | 3.4051      | 5684.62158   | 27.82411     | 49.4923 |

Figure s20. HPLC spectra of chiral **3b** in Table 3 Entry 4.

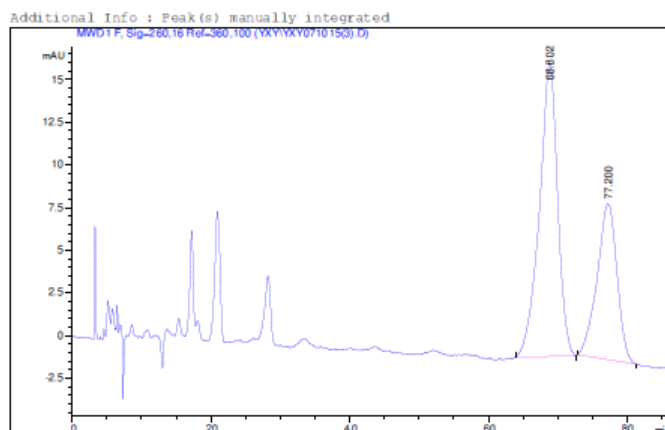

=====  
Area Percent Report  
=====

Sorted By : Signal  
Multiplier: : 1.0000  
Dilution: : 1.0000  
Sample Amount: : 1.00000 [ng/ul] (not used in calc.)  
Use Multiplier & Dilution Factor with ISTDs

Signal 1: MWD1 F, Sig=260,16 Ref=360,100

| Peak # | RetTime [min] | Type | Width [min] | Area [mAU*s] | Height [mAU] | Area %  |
|--------|---------------|------|-------------|--------------|--------------|---------|
| 1      | 68.802        | BB   | 2.1389      | 3126.46387   | 17.16551     | 63.2547 |
| 2      | 77.200        | BB   | 2.3280      | 1816.19788   | 9.13300      | 36.7453 |

Figure s21. HPLC spectra of chiral **3b** in Table 3 Entry 5.



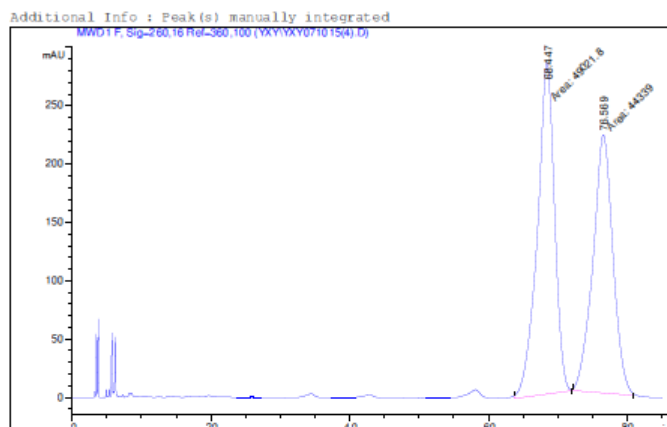

=====  
Area Percent Report  
=====

Sorted By : Signal  
Multiplier: : 1.0000  
Dilution: : 1.0000  
Sample Amount: : 1.00000 [ng/ul] (not used in calc.)  
Use Multiplier & Dilution Factor with ISTDs

Signal 1: MWD1 F, Sig=260,16 Ref=360,100

| Peak # | RetTime [min] | Type | Width [min] | Area [mAU*s] | Height [mAU] | Area %  |
|--------|---------------|------|-------------|--------------|--------------|---------|
| 1      | 68.447        | MM   | 2.8781      | 4.90218e4    | 283.87424    | 52.5079 |
| 2      | 76.569        | MM   | 3.3376      | 4.43390e4    | 221.41270    | 47.4921 |

Figure s22. HPLC spectra of chiral **3b** in Table 3 Entry 6.

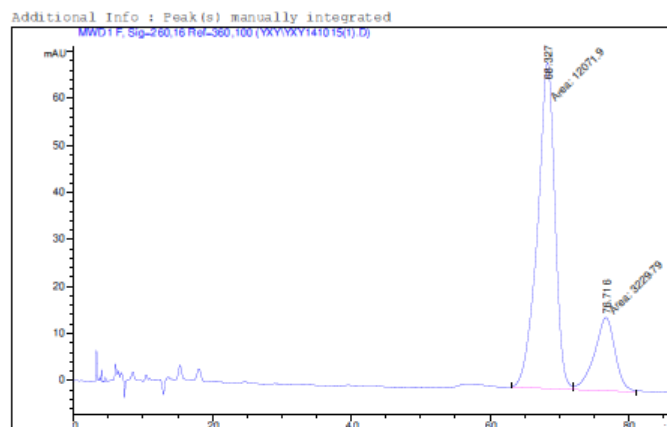

=====  
Area Percent Report  
=====

Sorted By : Signal  
Multiplier: : 1.0000  
Dilution: : 1.0000  
Sample Amount: : 1.00000 [ng/ul] (not used in calc.)  
Use Multiplier & Dilution Factor with ISTDs

Signal 1: MWD1 F, Sig=260,16 Ref=360,100

| Peak # | RetTime [min] | Type | Width [min] | Area [mAU*s] | Height [mAU] | Area %  |
|--------|---------------|------|-------------|--------------|--------------|---------|
| 1      | 68.327        | MF   | 2.9033      | 1.20719e4    | 69.30078     | 78.8926 |
| 2      | 76.716        | FM   | 3.4548      | 3229.78809   | 15.58112     | 21.1074 |

Figure s23. HPLC spectra of chiral **3b** in Table 3 Entry 7.

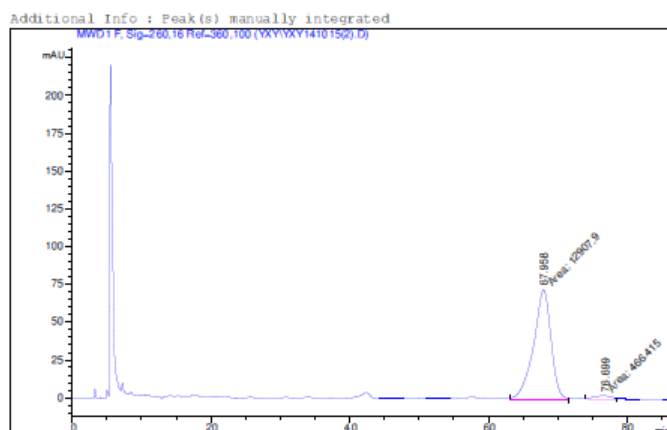

=====  
Area Percent Report  
=====

Sorted By : Signal  
Multiplier: : 1.0000  
Dilution: : 1.0000  
Sample Amount: : 1.00000 [ng/ul] (not used in calc.)  
Use Multiplier & Dilution Factor with ISTDs

Signal 1: MWD1 F, Sig=260,16 Ref=360,100

| Peak # | RetTime [min] | Type | Width [min] | Area [mAU*s] | Height [mAU] | Area %  |
|--------|---------------|------|-------------|--------------|--------------|---------|
| 1      | 67.958        | MM   | 2.9465      | 1.29079e4    | 73.01295     | 96.5126 |
| 2      | 76.699        | MM   | 3.0162      | 466.41479    | 2.57730      | 3.4874  |

Figure s24. HPLC spectra of chiral **3b** in Table 3 Entry 8.

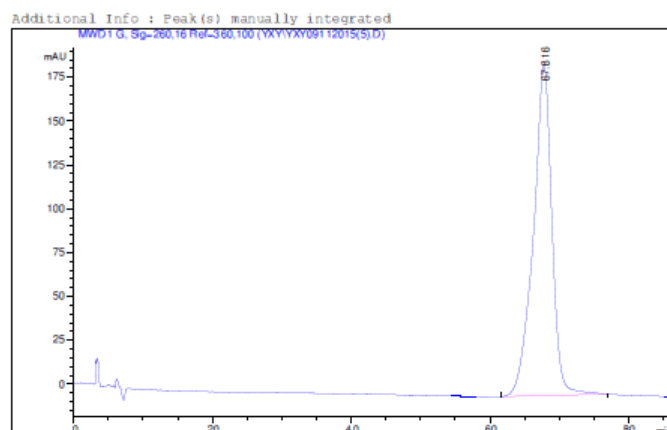

=====  
Area Percent Report  
=====

Sorted By : Signal  
Multiplier: : 1.0000  
Dilution: : 1.0000  
Sample Amount: : 1.00000 [ng/ul] (not used in calc.)  
Use Multiplier & Dilution Factor with ISTDs

Signal 1: MWD1 G, Sig=260,16 Ref=360,100

| Peak # | RetTime [min] | Type | Width [min] | Area [mAU*s] | Height [mAU] | Area %   |
|--------|---------------|------|-------------|--------------|--------------|----------|
| 1      | 67.816        | BB   | 2.6035      | 3.51101e4    | 188.80940    | 100.0000 |

Figure s25. HPLC spectra of chiral **3b** in Table 3 Entry 8 after a single recrystallization.

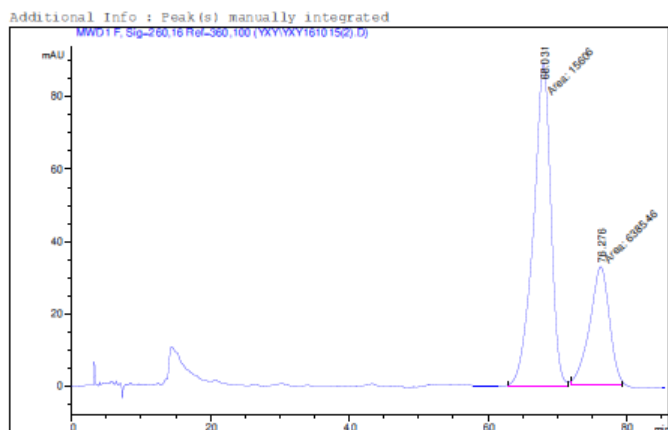

=====  
 Area Percent Report  
 =====

Sorted By : Signal  
 Multiplier: : 1.0000  
 Dilution: : 1.0000  
 Sample Amount: : 1.00000 [ng/ul] (not used in calc.)  
 Use Multiplier & Dilution Factor with ISTDs

Signal 1: MWD1 F, Sig=260,16 Ref=360,100

| Peak # | RetTime [min] | Type | Width [min] | Area [mAU*s] | Height [mAU] | Area %  |
|--------|---------------|------|-------------|--------------|--------------|---------|
| 1      | 68.031        | MM   | 2.9129      | 1.56060e4    | 89.29166     | 70.9639 |
| 2      | 76.276        | MM   | 3.2661      | 6385.45703   | 32.58500     | 29.0361 |

Figure s26. HPLC spectra of chiral **3b** in Table 3 Entry 9.

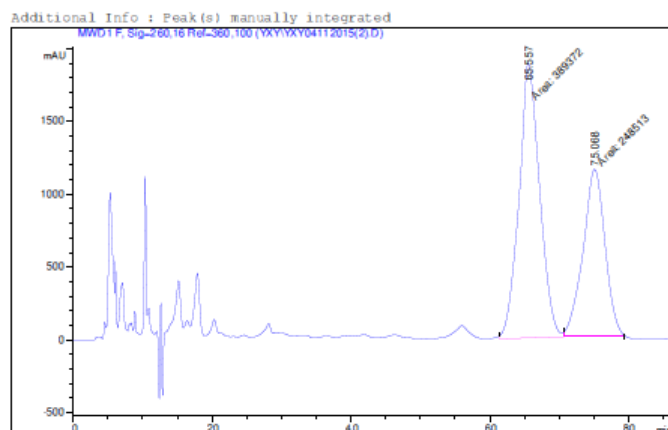

=====  
 Area Percent Report  
 =====

Sorted By : Signal  
 Multiplier: : 1.0000  
 Dilution: : 1.0000  
 Sample Amount: : 1.00000 [ng/ul] (not used in calc.)  
 Use Multiplier & Dilution Factor with ISTDs

Signal 1: MWD1 F, Sig=260,16 Ref=360,100

| Peak # | RetTime [min] | Type | Width [min] | Area [mAU*s] | Height [mAU] | Area %  |
|--------|---------------|------|-------------|--------------|--------------|---------|
| 1      | 65.557        | MM   | 3.4416      | 3.89372e5    | 1885.61292   | 61.0411 |
| 2      | 75.068        | MM   | 3.6295      | 2.48513e5    | 1141.17688   | 38.9589 |

Figure s27. HPLC spectra of chiral **3b** in Table 3 Entry 10.

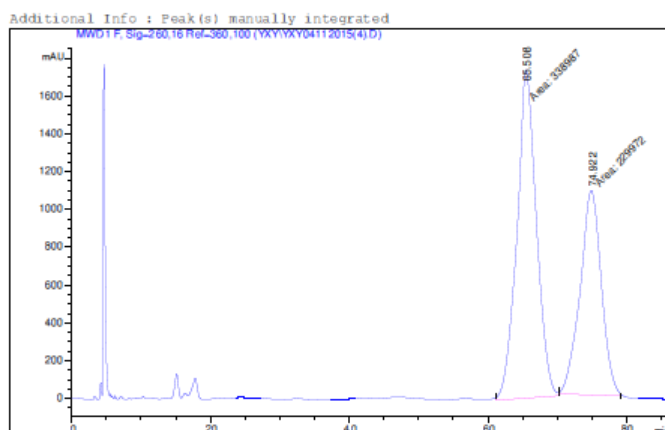

=====  
 Area Percent Report  
 =====

Sorted By : Signal  
 Multiplier: : 1.0000  
 Dilution: : 1.0000  
 Sample Amount: : 1.00000 (ng/ul) (not used in calc.)  
 Use Multiplier & Dilution Factor with ISTDs

Signal 1: MWD1 F, Sig=260,16 Ref=360,100

| Peak # | RetTime [min] | Type | Width [min] | Area [mAU*s] | Height [mAU] | Area %  |
|--------|---------------|------|-------------|--------------|--------------|---------|
| 1      | 65.508        | MM   | 3.2509      | 3.38987e5    | 1737.90320   | 59.5803 |
| 2      | 74.922        | MM   | 3.5412      | 2.29972e5    | 1082.36047   | 40.4197 |

Figure s28. HPLC spectra of chiral **3b** in Table 3 Entry 11.

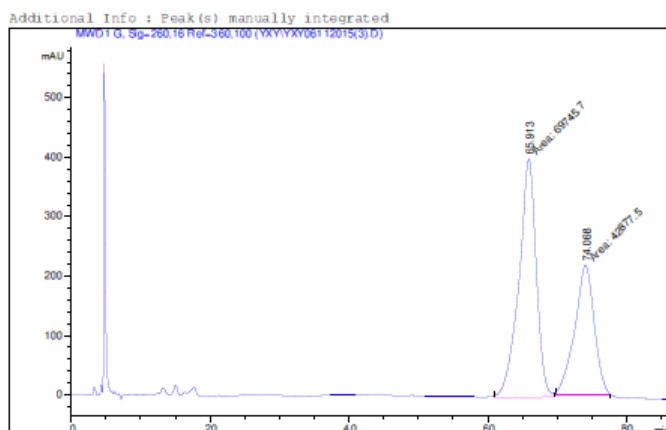

=====  
 Area Percent Report  
 =====

Sorted By : Signal  
 Multiplier: : 1.0000  
 Dilution: : 1.0000  
 Sample Amount: : 1.00000 (ng/ul) (not used in calc.)  
 Use Multiplier & Dilution Factor with ISTDs

Signal 1: MWD1 G, Sig=260,16 Ref=360,100

| Peak # | RetTime [min] | Type | Width [min] | Area [mAU*s] | Height [mAU] | Area %  |
|--------|---------------|------|-------------|--------------|--------------|---------|
| 1      | 65.913        | MM   | 2.8940      | 6.97457e4    | 401.67319    | 61.9284 |
| 2      | 74.068        | MM   | 3.2684      | 4.28775e4    | 218.64529    | 38.0716 |

Figure s29. HPLC spectra of chiral **3b** in Table 3 Entry 12.

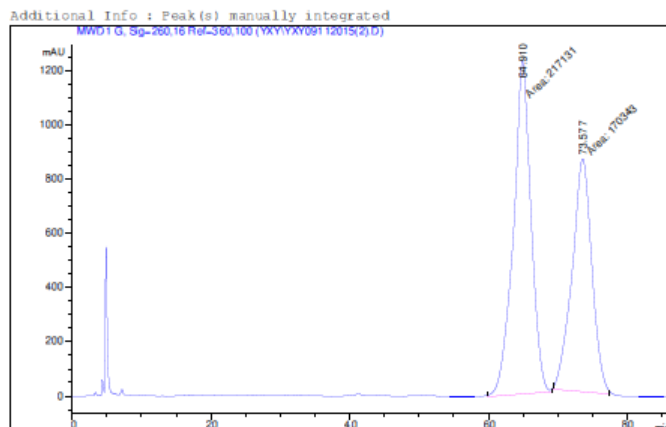

=====  
Area Percent Report  
=====

Sorted By : Signal  
Multiplier: : 1.0000  
Dilution: : 1.0000  
Sample Amount: : 1.00000 (ng/ul) (not used in calc.)  
Use Multiplier & Dilution Factor with ISTDs

Signal 1: MWD1 G, Sig=260,16 Ref=360,100

| Peak # | RetTime [min] | Type | Width [min] | Area [mAU*s] | Height [mAU] | Area %  |
|--------|---------------|------|-------------|--------------|--------------|---------|
| 1      | 64.910        | MM   | 2.9507      | 2.17131e5    | 1226.45667   | 56.0376 |
| 2      | 73.577        | MM   | 3.3052      | 1.70343e5    | 858.95428    | 43.9624 |

Figure s30. HPLC spectra of chiral **3b** in Table 3 Entry 13.

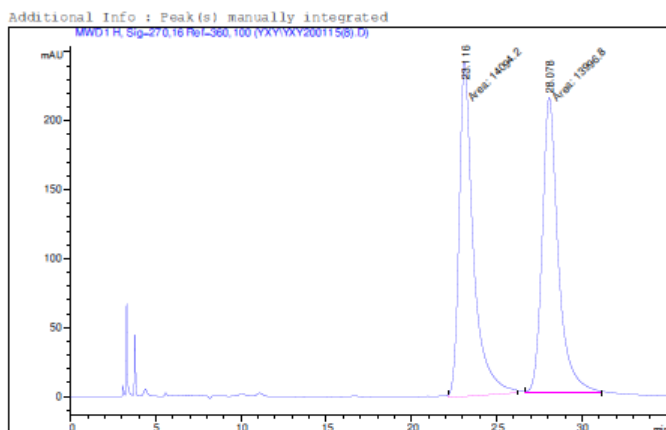

=====  
Area Percent Report  
=====

Sorted By : Signal  
Multiplier: : 1.0000  
Dilution: : 1.0000  
Sample Amount: : 1.00000 (ng/ul) (not used in calc.)  
Use Multiplier & Dilution Factor with ISTDs

Signal 1: MWD1 H, Sig=270,16 Ref=360,100

| Peak # | RetTime [min] | Type | Width [min] | Area [mAU*s] | Height [mAU] | Area %  |
|--------|---------------|------|-------------|--------------|--------------|---------|
| 1      | 23.116        | MM   | 0.9709      | 1.40942e4    | 241.94119    | 50.1733 |
| 2      | 28.078        | MM   | 1.0891      | 1.39968e4    | 214.18726    | 49.8267 |

Figure s31. HPLC spectra of racemic **3a**.

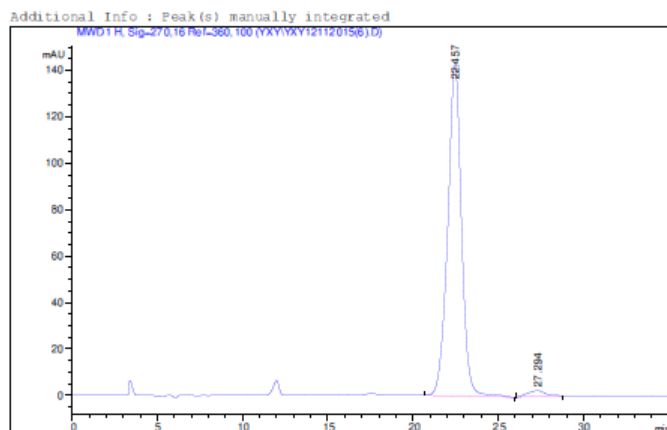

=====  
Area Percent Report  
=====

Sorted By : Signal  
Multiplier: : 1.0000  
Dilution: : 1.0000  
Sample Amount: : 1.00000 [ng/ul] (not used in calc.)  
Use Multiplier & Dilution Factor with ISTDs

Signal 1: MWD1 H, Sig=270,16 Ref=360,100

| Peak # | RetTime [min] | Type | Width [min] | Area [mAU*s] | Height [mAU] | Area %  |
|--------|---------------|------|-------------|--------------|--------------|---------|
| 1      | 22.457        | BB   | 0.8279      | 8023.23096   | 143.58231    | 97.8933 |
| 2      | 27.294        | BB   | 0.8114      | 172.56145    | 2.50121      | 2.1067  |

Figure s32. HPLC spectra of chiral **3a** in Table 3 Entry 14.

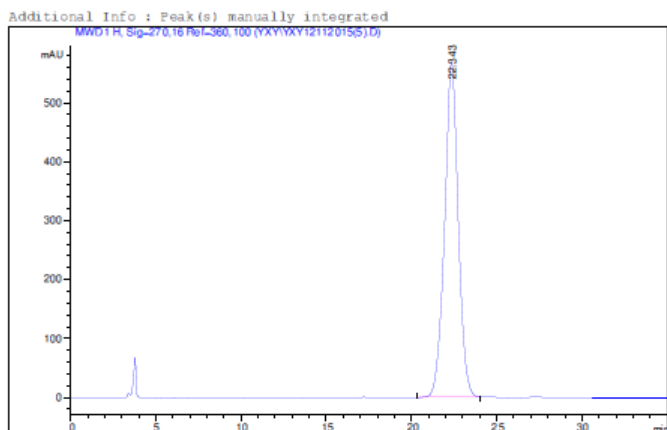

=====  
Area Percent Report  
=====

Sorted By : Signal  
Multiplier: : 1.0000  
Dilution: : 1.0000  
Sample Amount: : 1.00000 [ng/ul] (not used in calc.)  
Use Multiplier & Dilution Factor with ISTDs

Signal 1: MWD1 H, Sig=270,16 Ref=360,100

| Peak # | RetTime [min] | Type | Width [min] | Area [mAU*s] | Height [mAU] | Area %   |
|--------|---------------|------|-------------|--------------|--------------|----------|
| 1      | 22.343        | BB   | 0.8270      | 3.16957e4    | 568.04395    | 100.0000 |

Figure s33. HPLC spectra of chiral **3a** in Table 3 Entry 14 after a single recrystallization.

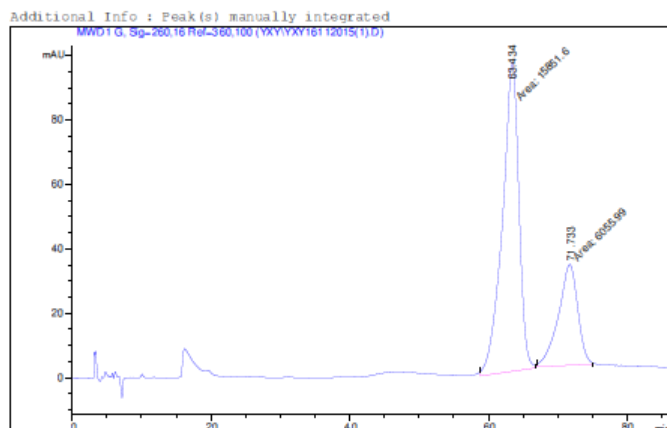

=====  
Area Percent Report  
=====

Sorted By : Signal  
Multiplier: : 1.0000  
Dilution: : 1.0000  
Sample Amount: : 1.00000 [ng/ul] (not used in calc.)  
Use Multiplier & Dilution Factor with ISTDs

Signal 1: MWD1 G, Sig=260,16 Ref=360,100

| Peak # | RetTime [min] | Type | Width [min] | Area [mAU*s] | Height [mAU] | Area %  |
|--------|---------------|------|-------------|--------------|--------------|---------|
| 1      | 63.434        | MM   | 2.7562      | 1.58516e4    | 95.85513     | 72.3566 |
| 2      | 71.733        | MM   | 3.2209      | 6055.98926   | 31.33655     | 27.6434 |

Figure s34. HPLC spectra of chiral **3b** in Table 3 Entry 15.

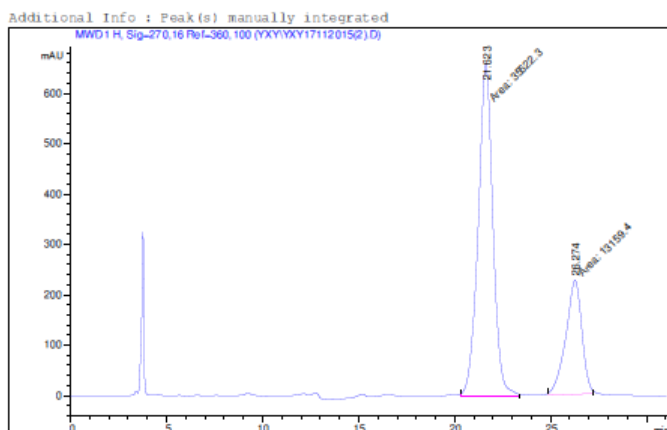

=====  
Area Percent Report  
=====

Sorted By : Signal  
Multiplier: : 1.0000  
Dilution: : 1.0000  
Sample Amount: : 1.00000 [ng/ul] (not used in calc.)  
Use Multiplier & Dilution Factor with ISTDs

Signal 1: MWD1 H, Sig=270,16 Ref=360,100

| Peak # | RetTime [min] | Type | Width [min] | Area [mAU*s] | Height [mAU] | Area %  |
|--------|---------------|------|-------------|--------------|--------------|---------|
| 1      | 21.623        | MM   | 0.8951      | 3.55223e4    | 661.45160    | 72.9685 |
| 2      | 26.274        | MM   | 0.9711      | 1.31594e4    | 225.85184    | 27.0315 |

Totals :                    4.86816e4    887.30344

Figure s35. HPLC spectra of chiral **3a** in Table 3 Entry 16.

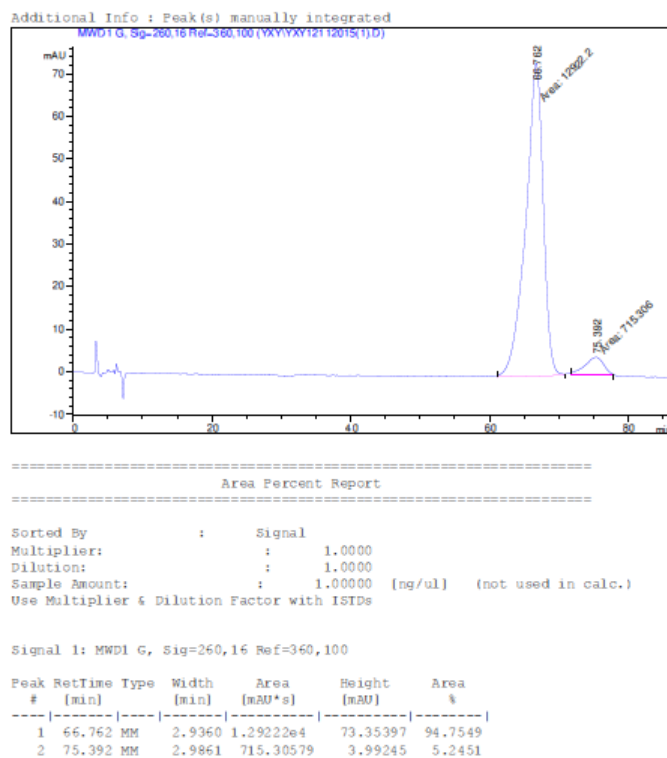

Figure s36. HPLC spectra of chiral **3b** in Table 4 Entry 1.

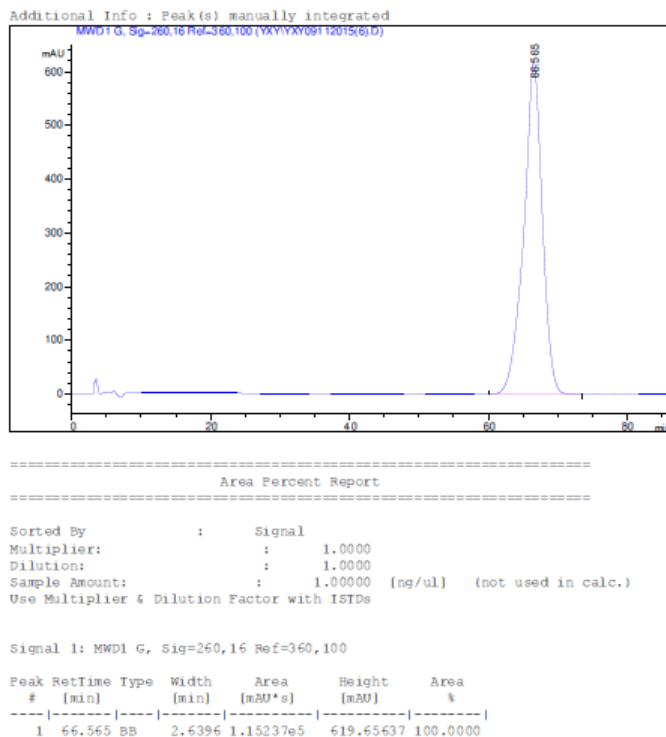

Figure s37. HPLC spectra of chiral **3b** in Table 4 Entry 1 after a single recrystallization.



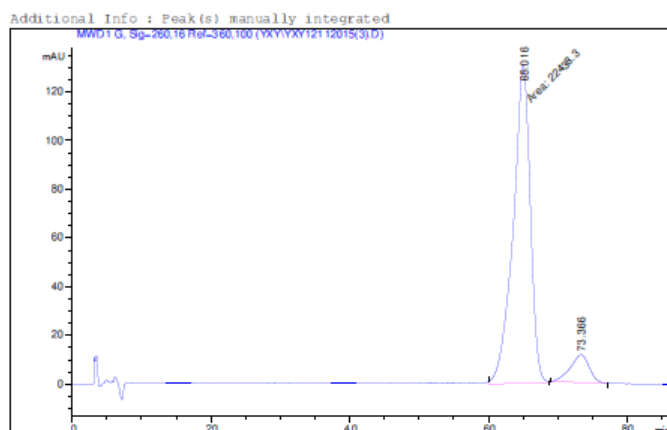

```

=====
                          Area Percent Report
=====
Sorted By      :      Signal
Multiplier:    :      1.0000
Dilution:      :      1.0000
Sample Amount: :      1.00000 [ng/ul] (not used in calc.)
Use Multiplier & Dilution Factor with ISTDs

Signal 1: MWD1 G, Sig=260,16 Ref=360,100

Peak RetTime Type Width Area Height Area
# [min] [min] [mAU*s] [mAU] %
-----|-----|-----|-----|-----|-----
1 65.016 MM 2.8566 2.24383e4 130.91524 91.2076
2 73.366 BB 2.2201 2163.03955 11.41831 8.7924

```

Figure s38. HPLC spectra of chiral **3b** in Table 4 Entry 2.

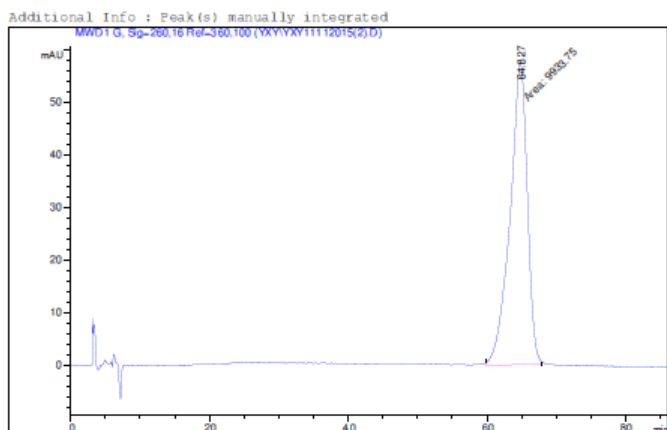

```

=====
                          Area Percent Report
=====
Sorted By      :      Signal
Multiplier:    :      1.0000
Dilution:      :      1.0000
Sample Amount: :      1.00000 [ng/ul] (not used in calc.)
Use Multiplier & Dilution Factor with ISTDs

Signal 1: MWD1 G, Sig=260,16 Ref=360,100

Peak RetTime Type Width Area Height Area
# [min] [min] [mAU*s] [mAU] %
-----|-----|-----|-----|-----|-----
1 64.827 MM 2.8880 9933.74512 57.32833 100.0000

```

Figure s39. HPLC spectra of chiral **3b** in Table 4 Entry 2 after a single recrystallization.

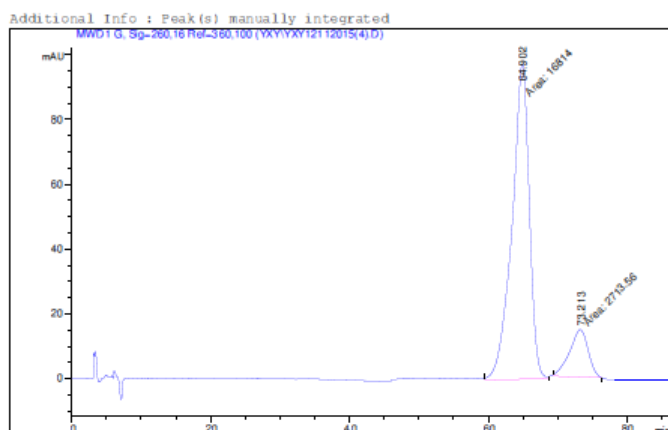

```

=====
                          Area Percent Report
=====
Sorted By      :      Signal
Multiplier:    :      1.0000
Dilution:      :      1.0000
Sample Amount: :      1.00000 [ng/ul] (not used in calc.)
Use Multiplier & Dilution Factor with ISTDs

Signal 1: MWD1 G, Sig=260,16 Ref=360,100

Peak RetTime Type Width Area Height Area
# [min] [min] [mAU*s] [mAU] %
-----|-----|-----|-----|-----|-----
1 64.902 MM 2.8845 1.68140e4 97.15002 86.1039
2 73.213 MM 3.0849 2713.56299 14.66041 13.8961

```

Figure s40. HPLC spectra of chiral **3b** in Table 4 Entry 3.

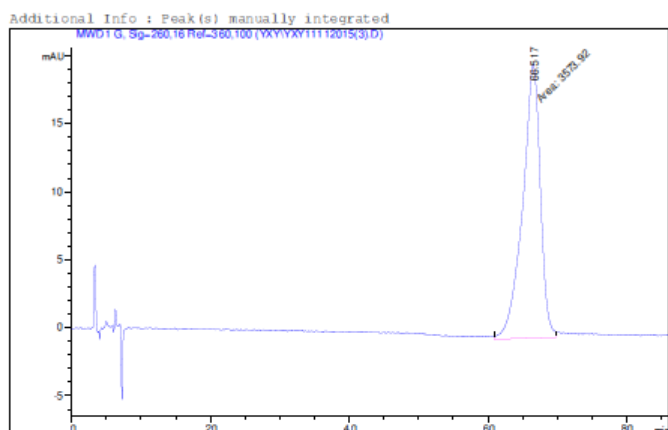

```

=====
                          Area Percent Report
=====
Sorted By      :      Signal
Multiplier:    :      1.0000
Dilution:      :      1.0000
Sample Amount: :      1.00000 [ng/ul] (not used in calc.)
Use Multiplier & Dilution Factor with ISTDs

Signal 1: MWD1 G, Sig=260,16 Ref=360,100

Peak RetTime Type Width Area Height Area
# [min] [min] [mAU*s] [mAU] %
-----|-----|-----|-----|-----|-----
1 66.517 MM 2.9589 3573.92017 20.13099 100.0000

```

Figure s41. HPLC spectra of chiral **3b** in Table 4 Entry 3 after a single recrystallization.

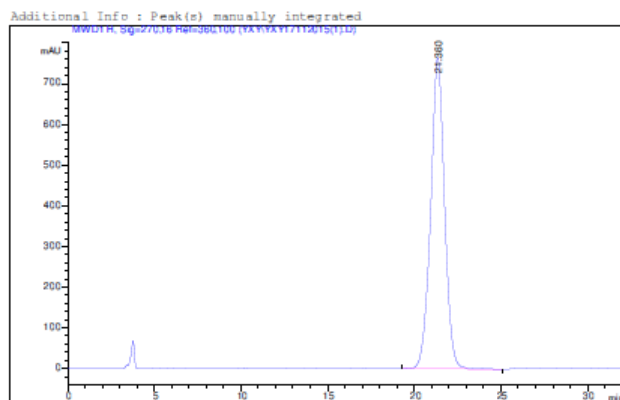

-----  
 Area Percent Report  
 -----

Sorted By : Signal  
 Multiplier: : 1.0000  
 Dilution: : 1.0000  
 Sample Amount: : 1.00000 [ng/ul] (not used in calc.)  
 Use Multiplier & Dilution Factor with ISTDs

Signal 1: MWD1 H, Sig=270,16 Ref=360,100

| Peak # | RetTime [min] | Type | Width [min] | Area [mAU*s] | Height [mAU] | Area %   |
|--------|---------------|------|-------------|--------------|--------------|----------|
| 1      | 21.360        | BB   | 0.8256      | 4.25477e4    | 764.13892    | 100.0000 |

Totals :                   4.25477e4   764.13892

Figure s42. HPLC spectra of chiral **3a** (after recrystallization) from catalytic “self-breeding” of complex **4a**.

## Crystallographic Data

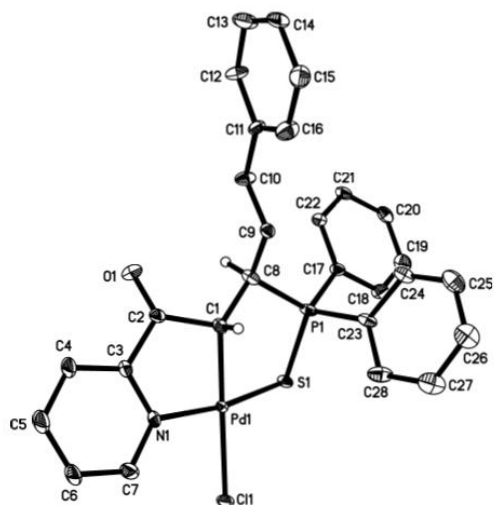

Figure s43. Single crystal X-ray structure of NC(*sp*<sup>3</sup>)S PdCl complex **4a**.

Table s1. Crystallographic data of NC(*sp*<sup>3</sup>)S PdCl complex **4a**.

|                                            |                                             |         |
|--------------------------------------------|---------------------------------------------|---------|
| <b>Chemical formula</b>                    | C <sub>28</sub> H <sub>23</sub> ClNOPdS     |         |
| <b>Formula weight</b>                      | 594.35 g/mol                                |         |
| <b>Temperature</b>                         | 103(2) K                                    |         |
| <b>Wavelength</b>                          | 0.71073 Å                                   |         |
| <b>Crystal size</b>                        | 0.400 x 0.410 x 0.420 mm                    |         |
| <b>Crystal habit</b>                       | yellow block                                |         |
| <b>Crystal system</b>                      | orthorhombic                                |         |
| <b>Space group</b>                         | P 21 21 21                                  |         |
| <b>Unit cell dimensions</b>                | a = 8.3737(3) Å                             | α = 90° |
|                                            | b = 12.3461(4) Å                            | β = 90° |
|                                            | c = 23.8575(7) Å                            | γ = 90° |
| <b>Volume</b>                              | 2466.45(14) Å <sup>3</sup>                  |         |
| <b>Z</b>                                   | 4                                           |         |
| <b>Density (calculated)</b>                | 1.601 g/cm <sup>3</sup>                     |         |
| <b>Absorption coefficient</b>              | 1.033 mm <sup>-1</sup>                      |         |
| <b>F(000)</b>                              | 1200                                        |         |
| <b>Theta range for data collection</b>     | 2.94 to 37.90°                              |         |
| <b>Index ranges</b>                        | -14 ≤ h ≤ 14, -21 ≤ k ≤ 14, -40 ≤ l ≤ 40    |         |
| <b>Reflections collected</b>               | 36512                                       |         |
| <b>Independent reflections</b>             | 13283 [R(int) = 0.0435]                     |         |
| <b>Coverage of independent reflections</b> | 99.5%                                       |         |
| <b>Absorption correction</b>               | multi-scan                                  |         |
| <b>Max. and min. transmission</b>          | 0.6830 and 0.6710                           |         |
| <b>Refinement method</b>                   | Full-matrix least-squares on F <sup>2</sup> |         |

|                                            |                                                               |                           |
|--------------------------------------------|---------------------------------------------------------------|---------------------------|
| <b>Refinement program</b>                  | SHELXL-2014/6 (Sheldrick, 2014)                               |                           |
| <b>Function minimized</b>                  | $\Sigma w(F_o^2 - F_c^2)^2$                                   |                           |
| <b>Data / restraints / parameters</b>      | 13283 / 651 / 419                                             |                           |
| <b>Goodness-of-fit on <math>F^2</math></b> | 1.250                                                         |                           |
| $\Delta/\sigma_{\max}$                     | 0.001                                                         |                           |
| <b>Final R indices</b>                     | 12637 data; $I > 2\sigma(I)$                                  | R1 = 0.0520, wR2 = 0.0992 |
|                                            | all data                                                      | R1 = 0.0555, wR2 = 0.1002 |
| <b>Weighting scheme</b>                    | $w=1/[\sigma^2(F_o^2)+4.5090P]$<br>where $P=(F_o^2+2F_c^2)/3$ |                           |
| <b>Absolute structure parameter</b>        | 0.0(0)                                                        |                           |
| <b>Largest diff. peak and hole</b>         | 1.144 and -2.716 eÅ <sup>-3</sup>                             |                           |
| <b>R.M.S. deviation from mean</b>          | 0.149 eÅ <sup>-3</sup>                                        |                           |

Table s2. Bond lengths (Å) for NC(sp<sup>3</sup>)S PdCl complex **4a**.

|           |           |           |            |           |           |
|-----------|-----------|-----------|------------|-----------|-----------|
| Pd1-C1    | 2.049(4)  | C18-C19   | 1.391(5)   | C11-C12   | 1.387(12) |
| Pd1-S1    | 2.2884(9) | C20-C21   | 1.389(7)   | C12-C13   | 1.365(14) |
| C1-C2     | 1.497(6)  | C23-C24   | 1.403(12)  | C14-C15   | 1.392(17) |
| C1-C8A    | 1.548(14) | C23-P1    | 1.851(11)  | C8A-C9A   | 1.560(17) |
| C2-C3     | 1.512(5)  | C25-C26   | 1.365(16)  | C9A-C10A  | 1.302(13) |
| C3-C4     | 1.385(6)  | C27-C28   | 1.393(16)  | C11A-C12A | 1.39      |
| C5-C6     | 1.383(7)  | C23A-C28A | 1.39       | C12A-C13A | 1.39      |
| C7-N1     | 1.339(5)  | C24A-C25A | 1.39       | C14A-C15A | 1.39      |
| C8-P1     | 1.811(14) | C26A-C27A | 1.39       | C17-C22   | 1.389(5)  |
| C10-C11   | 1.479(11) | P1-S1     | 2.0098(13) | C17-P1    | 1.795(3)  |
| C11-C16   | 1.415(13) | Pd1-N1    | 2.051(3)   | C19-C20   | 1.388(6)  |
| C13-C14   | 1.398(18) | Pd1-Cl1   | 2.3900(10) | C21-C22   | 1.385(5)  |
| C15-C16   | 1.391(15) | C1-C8     | 1.535(14)  | C23-C28   | 1.410(15) |
| C8A-P1    | 1.831(14) | C2-O1     | 1.211(5)   | C24-C25   | 1.384(16) |
| C10A-C11A | 1.500(10) | C3-N1     | 1.344(5)   | C26-C27   | 1.366(15) |
| C11A-C16A | 1.39      | C4-C5     | 1.388(6)   | C23A-C24A | 1.39      |
| C13A-C14A | 1.39      | C6-C7     | 1.392(6)   | C23A-P1   | 1.755(10) |
| C15A-C16A | 1.39      | C8-C9     | 1.483(17)  | C25A-C26A | 1.39      |
| C17-C18   | 1.398(5)  | C9-C10    | 1.326(11)  | C27A-C28A | 1.39      |

Table s3. Bond angles (°) for NC(sp<sup>3</sup>)S PdCl complex **4a**.

|            |            |            |            |
|------------|------------|------------|------------|
| C1-Pd1-N1  | 81.84(14)  | C1-Pd1-S1  | 91.97(11)  |
| N1-Pd1-S1  | 170.95(10) | C1-Pd1-Cl1 | 174.66(12) |
| N1-Pd1-Cl1 | 95.24(10)  | S1-Pd1-Cl1 | 91.43(3)   |
| C2-C1-C8   | 114.9(7)   | C2-C1-C8A  | 110.5(7)   |
| C2-C1-Pd1  | 103.3(2)   | C8-C1-Pd1  | 122.8(6)   |

|                |           |                |            |
|----------------|-----------|----------------|------------|
| C8A-C1-Pd1     | 117.3(6)  | O1-C2-C1       | 125.7(4)   |
| O1-C2-C3       | 121.4(4)  | C1-C2-C3       | 112.8(3)   |
| N1-C3-C4       | 122.2(3)  | N1-C3-C2       | 114.2(3)   |
| C4-C3-C2       | 123.6(4)  | C3-C4-C5       | 118.6(4)   |
| C6-C5-C4       | 118.9(4)  | C5-C6-C7       | 119.6(4)   |
| N1-C7-C6       | 121.0(4)  | C9-C8-C1       | 111.5(10)  |
| C9-C8-P1       | 113.7(10) | C1-C8-P1       | 104.6(9)   |
| C10-C9-C8      | 122.7(10) | C9-C10-C11     | 125.7(8)   |
| C12-C11-C16    | 117.1(8)  | C12-C11-C10    | 119.5(8)   |
| C16-C11-C10    | 123.3(8)  | C13-C12-C11    | 122.5(10)  |
| C12-C13-C14    | 120.2(11) | C15-C14-C13    | 119.2(12)  |
| C16-C15-C14    | 119.8(12) | C15-C16-C11    | 121.0(10)  |
| C1-C8A-C9A     | 113.8(10) | C1-C8A-P1      | 103.1(8)   |
| C9A-C8A-P1     | 116.9(10) | C10A-C9A-C8A   | 125.1(10)  |
| C9A-C10A-C11A  | 126.4(8)  | C12A-C11A-C16A | 120.0      |
| C12A-C11A-C10A | 122.1(6)  | C16A-C11A-C10A | 117.9(6)   |
| C13A-C12A-C11A | 120.0     | C12A-C13A-C14A | 120.0      |
| C15A-C14A-C13A | 120.0     | C14A-C15A-C16A | 120.0      |
| C15A-C16A-C11A | 120.0     | C22-C17-C18    | 120.3(3)   |
| C22-C17-P1     | 123.3(3)  | C18-C17-P1     | 116.4(3)   |
| C19-C18-C17    | 119.2(4)  | C20-C19-C18    | 120.3(4)   |
| C19-C20-C21    | 120.1(4)  | C22-C21-C20    | 120.0(4)   |
| C21-C22-C17    | 120.0(4)  | C24-C23-C28    | 117.0(10)  |
| C24-C23-P1     | 120.5(10) | C28-C23-P1     | 122.5(10)  |
| C25-C24-C23    | 121.6(10) | C26-C25-C24    | 119.5(10)  |
| C25-C26-C27    | 121.3(10) | C26-C27-C28    | 119.7(11)  |
| C27-C28-C23    | 120.7(10) | C24A-C23A-C28A | 120.0      |
| C24A-C23A-P1   | 120.1(9)  | C28A-C23A-P1   | 119.5(8)   |
| C23A-C24A-C25A | 120.0     | C26A-C25A-C24A | 120.0      |
| C27A-C26A-C25A | 120.0     | C26A-C27A-C28A | 120.0      |
| C27A-C28A-C23A | 120.0     | C7-N1-C3       | 119.6(4)   |
| C7-N1-Pd1      | 127.0(3)  | C3-N1-Pd1      | 112.2(2)   |
| C23A-P1-C17    | 105.7(6)  | C17-P1-C8      | 114.4(5)   |
| C23A-P1-C8A    | 108.5(8)  | C17-P1-C8A     | 112.2(5)   |
| C17-P1-C23     | 103.5(6)  | C8-P1-C23      | 108.1(8)   |
| C23A-P1-S1     | 115.9(5)  | C17-P1-S1      | 110.68(15) |
| C8-P1-S1       | 110.0(5)  | C8A-P1-S1      | 104.0(5)   |
| C23-P1-S1      | 109.9(5)  | P1-S1-Pd1      | 96.87(5)   |

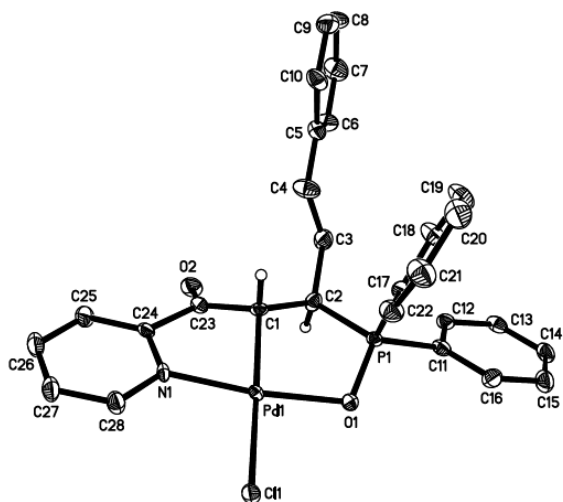

Figure s44. Single crystal X-ray structure of NC(*sp*<sup>3</sup>)S PdCl complex **4b**.

Table s4. Crystallographic data of NC(*sp*<sup>3</sup>)S PdCl complex **4b**.

|                                            |                                                       |                |
|--------------------------------------------|-------------------------------------------------------|----------------|
| <b>Chemical formula</b>                    | C <sub>28</sub> H <sub>23</sub> ClNO <sub>2</sub> PPd |                |
| <b>Formula weight</b>                      | 578.29 g/mol                                          |                |
| <b>Temperature</b>                         | 103(2) K                                              |                |
| <b>Wavelength</b>                          | 0.71073 Å                                             |                |
| <b>Crystal size</b>                        | 0.320 x 0.400 x 0.420 mm                              |                |
| <b>Crystal habit</b>                       | yellow block                                          |                |
| <b>Crystal system</b>                      | monoclinic                                            |                |
| <b>Space group</b>                         | P 1 21 1                                              |                |
| <b>Unit cell dimensions</b>                | a = 8.4079(4) Å                                       | α = 90°        |
|                                            | b = 12.0255(6) Å                                      | β = 90.682(3)° |
|                                            | c = 23.7756(12) Å                                     | γ = 90°        |
| <b>Volume</b>                              | 2403.8(2) Å <sup>3</sup>                              |                |
| <b>Z</b>                                   | 4                                                     |                |
| <b>Density (calculated)</b>                | 1.598 g/cm <sup>3</sup>                               |                |
| <b>Absorption coefficient</b>              | 0.977 mm <sup>-1</sup>                                |                |
| <b>F(000)</b>                              | 1168                                                  |                |
| <b>Theta range for data collection</b>     | 2.41 to 33.84°                                        |                |
| <b>Index ranges</b>                        | -13<=h<=13, -18<=k<=18, -36<=l<=37                    |                |
| <b>Reflections collected</b>               | 74249                                                 |                |
| <b>Independent reflections</b>             | 18919 [R(int) = 0.1015]                               |                |
| <b>Coverage of independent reflections</b> | 99.1%                                                 |                |
| <b>Absorption correction</b>               | Multi-Scan                                            |                |
| <b>Max. and min. transmission</b>          | 0.7450 and 0.6840                                     |                |
| <b>Structure solution technique</b>        | direct methods                                        |                |
| <b>Structure solution program</b>          | XT, VERSION 2014/4                                    |                |

|                                            |                                                                                     |
|--------------------------------------------|-------------------------------------------------------------------------------------|
| <b>Refinement method</b>                   | Full-matrix least-squares on $F^2$                                                  |
| <b>Refinement program</b>                  | SHELXL-2014/7 (Sheldrick, 2014)                                                     |
| <b>Function minimized</b>                  | $\Sigma w(F_o^2 - F_c^2)^2$                                                         |
| <b>Data / restraints / parameters</b>      | 18919 / 1 / 613                                                                     |
| <b>Goodness-of-fit on <math>F^2</math></b> | 1.074                                                                               |
| $\Delta/\sigma_{\max}$                     | 0.001                                                                               |
| <b>Final R indices</b>                     | 16986 data; $R1 = 0.0582$ , $wR2 = 0.1223$<br>$I > 2\sigma(I)$                      |
|                                            | all data $R1 = 0.0661$ , $wR2 = 0.1257$                                             |
| <b>Weighting scheme</b>                    | $w = 1/[\sigma^2(F_o^2) + (0.0284P)^2 + 4.7783P]$<br>where $P = (F_o^2 + 2F_c^2)/3$ |
| <b>Absolute structure parameter</b>        | 0.0(0)                                                                              |
| <b>Largest diff. peak and hole</b>         | 2.079 and -2.125 $e\text{\AA}^{-3}$                                                 |
| <b>R.M.S. deviation from mean</b>          | 0.154 $e\text{\AA}^{-3}$                                                            |

Table s5. Bond lengths ( $\text{\AA}$ ) for  $\text{NC}(sp^3)\text{S PdCl}$  complex **4b**.

|         |            |         |            |         |           |         |           |
|---------|------------|---------|------------|---------|-----------|---------|-----------|
| Pd1-N1  | 2.002(5)   | Pd1-C1  | 2.031(6)   | C26-C27 | 1.384(10) | C27-C28 | 1.381(9)  |
| Pd1-O1  | 2.073(4)   | Pd1-C11 | 2.4050(15) | C28-N1  | 1.358(8)  | C29-C51 | 1.489(8)  |
| Pd1-P1  | 2.9546(15) | Pd2-C29 | 2.023(5)   | C29-C30 | 1.541(8)  | C30-C31 | 1.508(8)  |
| Pd2-N2  | 2.024(5)   | Pd2-O3  | 2.068(4)   | C30-P2  | 1.822(6)  | C31-C32 | 1.320(9)  |
| Pd2-Cl2 | 2.4057(14) | C1-C23  | 1.485(9)   | C32-C33 | 1.476(9)  | C33-C34 | 1.395(10) |
| C1-C2   | 1.536(9)   | C2-C3   | 1.520(9)   | C33-C38 | 1.408(10) | C34-C35 | 1.370(10) |
| C2-P1   | 1.830(6)   | C3-C4   | 1.326(10)  | C35-C36 | 1.395(12) | C36-C37 | 1.399(11) |
| C4-C5   | 1.462(9)   | C5-C10  | 1.386(10)  | C37-C38 | 1.400(9)  | C39-C40 | 1.389(8)  |
| C5-C6   | 1.403(10)  | C6-C7   | 1.394(11)  | C39-C44 | 1.401(8)  | C39-P2  | 1.797(6)  |
| C7-C8   | 1.387(11)  | C8-C9   | 1.387(11)  | C40-C41 | 1.396(8)  | C41-C42 | 1.377(9)  |
| C9-C10  | 1.377(9)   | C11-C16 | 1.392(9)   | C42-C43 | 1.392(9)  | C43-C44 | 1.394(9)  |
| C11-C12 | 1.395(9)   | C11-P1  | 1.797(6)   | C45-C50 | 1.390(9)  | C45-C46 | 1.403(9)  |
| C12-C13 | 1.397(8)   | C13-C14 | 1.382(10)  | C45-P2  | 1.797(6)  | C46-C47 | 1.393(10) |
| C14-C15 | 1.390(10)  | C15-C16 | 1.385(9)   | C47-C48 | 1.382(11) | C48-C49 | 1.382(11) |
| C17-C18 | 1.384(9)   | C17-C22 | 1.409(9)   | C49-C50 | 1.403(10) | C51-O4  | 1.209(7)  |
| C17-P1  | 1.799(6)   | C18-C19 | 1.381(10)  | C51-C52 | 1.497(8)  | C52-N2  | 1.365(8)  |
| C19-C20 | 1.358(12)  | C20-C21 | 1.413(11)  | C52-C53 | 1.388(9)  | C53-C54 | 1.381(9)  |
| C21-C22 | 1.399(10)  | C23-O2  | 1.225(7)   | C54-C55 | 1.369(10) | C55-C56 | 1.384(9)  |
| C23-C24 | 1.512(8)   | C24-N1  | 1.344(8)   | C56-N2  | 1.337(8)  | O1-P1   | 1.528(4)  |
| C24-C25 | 1.391(9)   | C25-C26 | 1.391(10)  | O3-P2   | 1.531(4)  |         |           |

Table s6. Bond angles ( $^\circ$ ) for  $\text{NC}(sp^3)\text{S PdCl}$  complex **4b**.

|           |         |             |          |             |          |
|-----------|---------|-------------|----------|-------------|----------|
| N1-Pd1-C1 | 82.4(2) | C46-C45-P2  | 121.3(5) | C19-C18-C17 | 120.2(7) |
| C1-Pd1-O1 | 87.5(2) | C48-C47-C46 | 120.0(7) | C19-C20-C21 | 120.9(7) |



|             |            |             |            |             |          |
|-------------|------------|-------------|------------|-------------|----------|
| C1-Pd1-Cl1  | 174.65(17) | C48-C49-C50 | 120.2(7)   | C21-C22-C17 | 118.6(6) |
| N1-Pd1-P1   | 141.68(15) | O4-C51-C29  | 126.5(5)   | O2-C23-C24  | 121.2(6) |
| O1-Pd1-P1   | 29.22(12)  | C29-C51-C52 | 112.0(5)   | N1-C24-C25  | 122.7(6) |
| C29-Pd2-N2  | 82.4(2)    | N2-C52-C51  | 113.7(5)   | C25-C24-C23 | 124.0(6) |
| N2-Pd2-O3   | 168.21(18) | C54-C53-C52 | 118.9(6)   | C27-C26-C25 | 118.4(6) |
| N2-Pd2-Cl2  | 95.67(15)  | C54-C55-C56 | 119.7(6)   | N1-C28-C27  | 121.5(6) |
| C23-C1-C2   | 115.5(5)   | C24-N1-C28  | 118.4(5)   | C51-C29-Pd2 | 104.3(4) |
| C2-C1-Pd1   | 114.6(4)   | C28-N1-Pd1  | 126.8(4)   | C31-C30-C29 | 110.5(5) |
| C3-C2-P1    | 118.4(5)   | C56-N2-Pd2  | 126.8(4)   | C29-C30-P2  | 102.6(4) |
| C4-C3-C2    | 125.7(6)   | P1-O1-Pd1   | 109.3(2)   | C31-C32-C33 | 126.3(6) |
| C10-C5-C6   | 117.9(6)   | O1-P1-C11   | 111.6(3)   | C34-C33-C32 | 118.7(6) |
| C6-C5-C4    | 123.7(6)   | C11-P1-C17  | 103.3(3)   | C35-C34-C33 | 121.5(7) |
| C8-C7-C6    | 119.1(7)   | C11-P1-C2   | 113.7(3)   | C35-C36-C37 | 120.4(6) |
| C10-C9-C8   | 121.0(7)   | O1-P1-Pd1   | 41.47(16)  | C37-C38-C33 | 120.9(6) |
| C16-C11-C12 | 119.6(6)   | C17-P1-Pd1  | 100.9(2)   | C40-C39-P2  | 121.9(5) |
| C12-C11-P1  | 122.4(5)   | O3-P2-C39   | 112.5(2)   | C39-C40-C41 | 119.2(6) |
| C14-C13-C12 | 120.0(6)   | C39-P2-C45  | 104.7(3)   | C41-C42-C43 | 121.0(6) |
| C16-C15-C14 | 120.1(7)   | C39-P2-C30  | 112.1(3)   | C43-C44-C39 | 119.3(6) |
| C18-C17-C22 | 120.5(6)   | N1-Pd1-O1   | 168.63(19) | C50-C45-P2  | 120.0(5) |
| C22-C17-P1  | 118.7(5)   | N1-Pd1-Cl1  | 96.01(15)  | C47-C46-C45 | 120.8(7) |
| C20-C19-C18 | 120.4(7)   | O1-Pd1-Cl1  | 94.52(12)  | C49-C48-C47 | 120.0(7) |
| C22-C21-C20 | 119.3(7)   | C1-Pd1-P1   | 59.40(17)  | C45-C50-C49 | 120.5(6) |
| O2-C23-C1   | 126.5(6)   | Cl1-Pd1-P1  | 121.71(5)  | O4-C51-C52  | 121.5(6) |
| C1-C23-C24  | 112.2(5)   | C29-Pd2-O3  | 87.29(19)  | N2-C52-C53  | 120.5(6) |
| N1-C24-C23  | 113.2(5)   | C29-Pd2-Cl2 | 174.04(16) | C53-C52-C51 | 125.7(6) |
| C24-C25-C26 | 118.7(6)   | O3-Pd2-Cl2  | 95.13(12)  | C55-C54-C53 | 119.9(6) |
| C28-C27-C26 | 120.3(7)   | C23-C1-Pd1  | 104.7(4)   | N2-C56-C55  | 120.9(6) |
| C51-C29-C30 | 115.7(5)   | C3-C2-C1    | 115.0(5)   | C24-N1-Pd1  | 114.4(4) |
| C30-C29-Pd2 | 116.0(4)   | C1-C2-P1    | 100.7(4)   | C56-N2-C52  | 120.1(5) |
| C31-C30-P2  | 115.4(4)   | C3-C4-C5    | 125.9(7)   | C52-N2-Pd2  | 112.6(4) |
| C32-C31-C30 | 125.3(6)   | C10-C5-C4   | 118.4(6)   | P2-O3-Pd2   | 111.2(2) |
| C34-C33-C38 | 118.3(6)   | C7-C6-C5    | 121.5(7)   | O1-P1-C17   | 111.3(3) |
| C38-C33-C32 | 122.9(6)   | C7-C8-C9    | 119.5(6)   | O1-P1-C2    | 107.3(3) |
| C34-C35-C36 | 120.0(8)   | C9-C10-C5   | 120.8(7)   | C17-P1-C2   | 109.7(3) |
| C36-C37-C38 | 118.9(7)   | C16-C11-P1  | 117.7(5)   | C11-P1-Pd1  | 149.8(2) |
| C40-C39-C44 | 120.8(6)   | C11-C12-C13 | 120.0(6)   | C2-P1-Pd1   | 73.9(2)  |
| C44-C39-P2  | 117.2(4)   | C13-C14-C15 | 120.1(6)   | O3-P2-C45   | 111.0(3) |
| C42-C41-C40 | 120.1(6)   | C15-C16-C11 | 120.2(6)   | O3-P2-C30   | 107.8(2) |
| C42-C43-C44 | 119.5(6)   | C18-C17-P1  | 120.5(5)   | C45-P2-C30  | 108.7(3) |
| C50-C45-C46 | 118.5(6)   |             |            |             |          |

### **Selected Bond Lengths and Angles of Complex 4**

Table s7. Selected bond lengths (Å) and angles (°) of complex **4**.

|                                | <b>(<i>R,R</i>)-4a</b> | <b>(<i>R,R</i>)-4b</b> |
|--------------------------------|------------------------|------------------------|
| Pd←N                           | 2.051(3)               | 2.002(5)               |
| Pd←E (E = S, O)                | 2.288(1)               | 2.073(4)               |
| Pd-Cl                          | 2.390(1)               | 2.405(2)               |
| Pd-C( <i>sp</i> <sup>3</sup> ) | 2.049(4)               | 2.031(6)               |
| C-Pd←E                         | 91.97(11)              | 87.50(20)              |
| C-Pd←N                         | 81.84(14)              | 82.40(20)              |
| C-Pd-Cl                        | 174.66(12)             | 174.65(17)             |
| Cl-Pd←E                        | 91.43(3)               | 94.52(12)              |
| Cl-Pd←N                        | 95.24(10)              | 96.01(15)              |
| N→Pd←E                         | 170.95(10)             | 168.63(19)             |
